# Supplementary material for: Prognostic and Predictive Biomarkers in Head and Neck Squamous Cell Carcinoma Treated with Radiotherapy—A Systematic Review
Source: Biomedicines. 2022 Dec 19;10(12):3288. doi: 10.3390/biomedicines10123288 (PMC9775486; doi:10.3390/biomedicines10123288)
Supplement: Supplementary file 1 [file biomedicines-10-03288-s001.zip › biomarker_table_supplement_MDPI.xlsx]

## Sheet: biomarker_table_supplement
Biomarker Category	PMID	Total number of patients	Data Collection	Male patients	Female patients	Oropharynx primary tumors	Hypopharynx primary tumors	Larynx primary tumors	Oral cavity primary tumors	AJCC early patients	AJCC advanced patients	Concomitant systemic therapy percentage	Minimum applied radiotherapy EQD2	Radiotherapy indication	Biomarker category	Biomarker origin	Biomarker name	Biomarker Measurement	Number of Patients	Outcome category	Statistical test	Outcome measure	Outcome value	95% CI Lower	95% CI Upper	Outcome p-value	OncoKB drug
Biochemistry marker
	20358469	29	Prospective Cohort	22	7			8	0	7	22		60	Mixed	Biochemistry marker	Blood	alpha-carotene	Plasma level	29	PFS	multivariable	HR	0.35	1.12	1	0.06
	20358469	29	Prospective Cohort	22	7			8	0	7	22		60	Mixed	Biochemistry marker	Blood	alpha-tocopherol	Plasma level	29	PFS	multivariable	HR	0.96	0.35	3	0.94
	20358469	29	Prospective Cohort	22	7			8	0	7	22		60	Mixed	Biochemistry marker	Blood	beta-carotene	Plasma level	29	PFS	multivariable	HR	0.3	0.09	1	0.04
	34268826	101	Retrospective	78	23	101	0	0	0	49	52		70	Primary	Biochemistry marker	Blood	CRP / Albumin ratio	Serum/plasma level	101	OS	multivariable	HR	1.2	0.52	3	0.67
	20358469	29	Prospective Cohort	22	7			8	0	7	22		60	Mixed	Biochemistry marker	Blood	gamma-tocopherol	Plasma level	29	PFS	multivariable	HR	0.84	0.28	2	0.75
	34268826	101	Retrospective	78	23	101	0	0	0	49	52		70	Primary	Biochemistry marker	Blood	LDHA	Serum/plasma level	101	OS	multivariable	HR	2.38	1.13	5	0.02
	20358469	29	Prospective Cohort	22	7			8	0	7	22		60	Mixed	Biochemistry marker	Blood	Lutein	Plasma level	29	PFS	multivariable	HR	0.21	0.05	0.9	0.04
	20358469	29	Prospective Cohort	22	7			8	0	7	22		60	Mixed	Biochemistry marker	Blood	lycopene	Plasma level	29	PFS	multivariable	HR	0.59	0.22	2	0.29
	22096023	578	Retrospective	501	77	318	74	105	81	0	578	100	60	Primary	Biochemistry marker	Blood	SPP1	Plasma level	578	LRF	multivariable	HR	0.91			0.91
	22096023	578	Prospective randomized trial	501	77	318	74	105	81	0	578	100	60	Primary	Biochemistry marker	Blood	SPP1	Plasma level	578	OS	multivariable	HR	1.03			0.95
	20358469	29	Prospective Cohort	22	7			8	0	7	22		60	Mixed	Biochemistry marker	Blood	total carotenoids	Plasma level	29	PFS	multivariable	HR	0.44	0.14	1	0.17
	20358469	29	Prospective Cohort	22	7			8	0	7	22		60	Mixed	Biochemistry marker	Blood	total tocopherols	Plasma level	29	PFS	multivariable	HR	0.8	0.27	2	0.68
	20358469	29	Prospective Cohort	22	7			8	0	7	22		60	Mixed	Biochemistry marker	Blood	RPE65	Plasma level	29	PFS	multivariable	HR	0.38	0.11	1	0.11
CTCs
	25057171	144	Self-proclaimed prospective	117	27	63	12	17	40	0	144	47	56	Adjuvant	Other	Blood	Circulating tumor cells (CTCs)	Presence	144	DFS	multivariable	HR	4.3	1.7	11	0
	25057171	144	Self-proclaimed prospective	117	27	63	12	17	40	0	144	47	56	Adjuvant	Other	Blood	Circulating tumor cells (CTCs)	Presence	144	OS	multivariable	HR	2.7	1.2	6	0.02
	25057171	144	Self-proclaimed prospective	117	27	63	12	17	40	0	144	47	56	Adjuvant	Other	Blood	Circulating tumor cells (CTCs)	Presence	144	DFS	univariable	HR	1.4	0.6	3	0.35
	25057171	144	Self-proclaimed prospective	117	27	63	12	17	40	0	144	47	56	Adjuvant	Other	Blood	Circulating tumor cells (CTCs)	Presence	144	OS	univariable	HR	1	0.5	2	0.91
DNA
	22241958	73	Retrospective	68	5	16		0	26					Primary	DNA	Tumor	41-gene-model	Response prediction	73	OS	multivariable	HR	0.37			0.05
	22241958	73	Retrospective	68	5	16		0	26					Primary	DNA	Tumor	41-gene-model	Response prediction	73	DMFS	multivariable	HR	0.36			0.07
	30038710	62	Retrospective	51	11	17	45	34		2	60	43.5		Mixed	DNA	Germline DNA	APEH	SNP 521 G>C genotype	62	OS	multivariable	HR	3.04	1.07	9	0.04
	22076708	531	Prospective randomized trial	420	111	25	0	443	63	330	201		64	Mixed	DNA	Tumor	CCND1	SNP rs603965 presence	531	OS	multivariable	Global Wald test (co-dominant model)				0.08
	22076708	531	Prospective randomized trial	420	111	25	0	443	63	330	201		64	Mixed	DNA	Tumor	CCND1	SNP rs603965 presence	531	DFS	multivariable	aHR (additive model)	0.86	0.7	1	0.14
	22076708	531	Prospective randomized trial	420	111	25	0	443	63	330	201		64	Mixed	DNA	Tumor	CCND1	SNP rs678653 presence	531	OS	multivariable	Global Wald test (co-dominant model)				0.2
	21890746	275	Prospective Cohort	219	56	115	0	37	101	0	275	79		Mixed	DNA	Germline DNA	CCND1	Genotype	275	OS	multivariable	HR	1	0.67	2	0.26
	22076708	531	Prospective randomized trial	420	111	25	0	443	63	330	201		64	Mixed	DNA	Tumor	CCND1	SNP rs603965 presence	531	DFS	multivariable	Global Wald test (co-dominant model)				0.33
	22076708	531	Prospective randomized trial	420	111	25	0	443	63	330	201		64	Mixed	DNA	Tumor	CCND1	SNP rs678653 presence	531	OS	multivariable	aHR (additive model)	1.09	0.89	1	0.42
	22076708	531	Prospective randomized trial	420	111	25	0	443	63	330	201		64	Mixed	DNA	Tumor	CCND1	SNP rs678653 presence	531	DFS	multivariable	Global Wald test (co-dominant model)				0.63
	22076708	531	Prospective randomized trial	420	111	25	0	443	63	330	201		64	Mixed	DNA	Tumor	CCND1	SNP rs678653 presence	531	DFS	multivariable	aHR (additive model)	1.06	0.85	1	0.63
	22076708	531	Prospective randomized trial	420	111	25	0	443	63	330	201		64	Mixed	DNA	Tumor	CCND1	SNP rs603965 presence	531	OS	multivariable	aHR (additive model)	0.97	0.79	1	0.74
	22076708	531	Prospective randomized trial	420	111	25	0	443	63	330	201		64	Mixed	DNA	Tumor	CTLA4	SNP rs231775 presence	531	OS	multivariable	aHR (additive model)	1.32	1.08	2	0.01
	22076708	531	Prospective randomized trial	420	111	25	0	443	63	330	201		64	Mixed	DNA	Tumor	CTLA4	SNP rs231775 presence	531	OS	multivariable	Global Wald test (co-dominant model)				0.02
	22076708	531	Prospective randomized trial	420	111	25	0	443	63	330	201		64	Mixed	DNA	Tumor	CTLA4	SNP rs231775 presence	531	DFS	multivariable	aHR (additive model)	1.14	0.93	1	0.2
	22076708	531	Prospective randomized trial	420	111	25	0	443	63	330	201		64	Mixed	DNA	Tumor	CTLA4	SNP rs231775 presence	531	DFS	multivariable	Global Wald test (co-dominant model)				0.44
	23169318	522	Prospective randomized trial	413	109			436		522	0			Primary	DNA	Germline DNA	CYP24A1		522	OS	multivariable	HR	1.23	1	2	0.05
	22076708	531	Prospective randomized trial	420	111	25	0	443	63	330	201		64	Mixed	DNA	Tumor	CYP2D6	SNP rs3892097 presence	531	OS	multivariable	aHR (additive model)	1.19	0.94	2	0.15
	22076708	531	Prospective randomized trial	420	111	25	0	443	63	330	201		64	Mixed	DNA	Tumor	CYP2D6	SNP rs3892097 presence	531	OS	multivariable	Global Wald test (co-dominant model)				0.16
	22076708	531	Prospective randomized trial	420	111	25	0	443	63	330	201		64	Mixed	DNA	Tumor	CYP2D6	Deletion status	531	OS	multivariable	aHR (additive model)	0.91	0.64	1	0.63
	22076708	531	Prospective randomized trial	420	111	25	0	443	63	330	201		64	Mixed	DNA	Tumor	CYP2D6	Deletion status	531	OS	multivariable	Global Wald test (co-dominant model)				0.72
	22076708	531	Prospective randomized trial	420	111	25	0	443	63	330	201		64	Mixed	DNA	Tumor	CYP2D6	Deletion status	531	DFS	multivariable	aHR (additive model)	0.96	0.65	1	0.83
	22076708	531	Prospective randomized trial	420	111	25	0	443	63	330	201		64	Mixed	DNA	Tumor	CYP2D6	SNP rs3892097 presence	531	DFS	multivariable	Global Wald test (co-dominant model)				0.84
	22076708	531	Prospective randomized trial	420	111	25	0	443	63	330	201		64	Mixed	DNA	Tumor	CYP2D6	Deletion status	531	DFS	multivariable	Global Wald test (co-dominant model)				0.87
	22076708	531	Prospective randomized trial	420	111	25	0	443	63	330	201		64	Mixed	DNA	Tumor	CYP2D6	SNP rs3892097 presence	531	DFS	multivariable	aHR (additive model)	1	0.78	1	0.97
	22076708	531	Prospective randomized trial	420	111	25	0	443	63	330	201		64	Mixed	DNA	Tumor	DNMT3B	SNP rs2424913 presence	531	DFS	multivariable	aHR (additive model)	1.15	0.94	1	0.16
	22076708	531	Prospective randomized trial	420	111	25	0	443	63	330	201		64	Mixed	DNA	Tumor	DNMT3B	SNP rs2424913 presence	531	DFS	multivariable	Global Wald test (co-dominant model)				0.32
	22076708	531	Prospective randomized trial	420	111	25	0	443	63	330	201		64	Mixed	DNA	Tumor	DNMT3B	SNP rs2424913 presence	531	OS	multivariable	Global Wald test (co-dominant model)				0.61
	22076708	531	Prospective randomized trial	420	111	25	0	443	63	330	201		64	Mixed	DNA	Tumor	DNMT3B	SNP rs2424913 presence	531	OS	multivariable	aHR (additive model)	1.01	0.83	1	0.9
	21079141	39	Prospective non-randomized	34	5	23	3	5	3	0	39		70	Primary	DNA	Tumor	EGFR	FISH	39	OS						ns	Afatinib, Dacomitinib, Erlotinib, Erlotinib + Ramucirumab, Gefitinib, Osimertinib, Amivantamab, Mobocertinib, Erlotinib, Patritumab Deruxtecan, CLN-081, Poziotinib
	21079141	39	Prospective non-randomized	34	5	23	3	5	3	0	39		70	Primary	DNA	Tumor	EGFR	FISH	39	PFS						ns	Afatinib, Dacomitinib, Erlotinib, Erlotinib + Ramucirumab, Gefitinib, Osimertinib, Amivantamab, Mobocertinib, Erlotinib, Patritumab Deruxtecan, CLN-081, Poziotinib
	33882281	146	Prospective Cohort	107	39	77		23	24			78.8		Mixed	DNA	Germline DNA	Epigenetic Age Acceleration (EAA)	EAA, end of RT	146	OS	multivariable	HR	1.33	1.15	2	<0.001
	33882281	146	Prospective Cohort	107	39	77		23	24			78.8		Mixed	DNA	Germline DNA	Epigenetic Age Acceleration (EAA)	EAA, end of RT	146	PFS	multivariable	HR	1.32	1.16	2	<0.001
	33882281	146	Prospective Cohort	107	39	77		23	24			78.8		Mixed	DNA	Germline DNA	Epigenetic Age Acceleration (EAA)	EAA, 6-months post-RT	146	OS	univariable	Log-rank	worse			0
	33882281	146	Prospective Cohort	107	39	77		23	24			78.8		Mixed	DNA	Germline DNA	Epigenetic Age Acceleration (EAA)	EAA, pre-RT	146	PFS	multivariable	HR	1.13	1.03	1	0.01
	33882281	146	Prospective Cohort	107	39	77		23	24			78.8		Mixed	DNA	Germline DNA	Epigenetic Age Acceleration (EAA)	EAA, pre-RT	146	PFS	univariable	Log-rank	worse			0.02
	33882281	146	Prospective Cohort	107	39	77		23	24			78.8		Mixed	DNA	Germline DNA	Epigenetic Age Acceleration (EAA)	EAA, 6-months post-RT	146	PFS	multivariable	HR	1.08	1.02	1	0.03
	33882281	146	Prospective Cohort	107	39	77		23	24			78.8		Mixed	DNA	Germline DNA	Epigenetic Age Acceleration (EAA)	EAA, 12-months post-RT	146	OS	multivariable	HR	1.15	1.01	1	0.04
	33882281	146	Prospective Cohort	107	39	77		23	24			78.8		Mixed	DNA	Germline DNA	Epigenetic Age Acceleration (EAA)	EAA, 6-months post-RT	146	OS	multivariable	HR	1.07	0.98	1	0.13
	33882281	146	Prospective Cohort	107	39	77		23	24			78.8		Mixed	DNA	Germline DNA	Epigenetic Age Acceleration (EAA)	EAA, 12-months post-RT	146	PFS	multivariable	HR	1.04	0.95	1	0.46
	33882281	146	Prospective Cohort	107	39	77		23	24			78.8		Mixed	DNA	Germline DNA	Epigenetic Age Acceleration (EAA)	EAA, pre-RT	146	OS	multivariable	HR	1.02	0.9	1	0.78
	31749055	225	Retrospective	200	25	67	86	72	0	88	137		66.6	Primary	DNA	Germline DNA	ERCC1	C8092A polymorphism presence	225	OS	multivariable	HR	3.56	1.22	7	0.02
	22076708	531	Prospective randomized trial	420	111	25	0	443	63	330	201		64	Mixed	DNA	Tumor	ERCC1	SNP rs735482 presence	531	DFS	multivariable	Global Wald test (co-dominant model)				0.03
	22076708	531	Prospective randomized trial	420	111	25	0	443	63	330	201		64	Mixed	DNA	Tumor	ERCC1	SNP rs3212986 presence	531	DFS	multivariable	Global Wald test (co-dominant model)				0.12
	22076708	531	Prospective randomized trial	420	111	25	0	443	63	330	201		64	Mixed	DNA	Tumor	ERCC1	SNP rs735482 presence	531	DFS	multivariable	aHR (additive model)	0.78	0.55	1	0.15
	22076708	531	Prospective randomized trial	420	111	25	0	443	63	330	201		64	Mixed	DNA	Tumor	ERCC1	SNP rs3212986 presence	531	OS	multivariable	Global Wald test (co-dominant model)				0.16
	22076708	531	Prospective randomized trial	420	111	25	0	443	63	330	201		64	Mixed	DNA	Tumor	ERCC1	SNP rs3212986 presence	531	OS	multivariable	aHR (additive model)	0.85	0.67	1	0.19
	22076708	531	Prospective randomized trial	420	111	25	0	443	63	330	201		64	Mixed	DNA	Tumor	ERCC1	SNP rs735482 presence	531	OS	multivariable	aHR (additive model)	0.92	0.68	1	0.58
	22076708	531	Prospective randomized trial	420	111	25	0	443	63	330	201		64	Mixed	DNA	Tumor	ERCC1	SNP rs3212986 presence	531	DFS	multivariable	aHR (additive model)	0.96	0.75	1	0.76
	22076708	531	Prospective randomized trial	420	111	25	0	443	63	330	201		64	Mixed	DNA	Tumor	ERCC1	SNP rs735482 presence	531	OS	multivariable	Global Wald test (co-dominant model)				0.79
	21890746	275	Prospective Cohort	219	56	115	0	37	101	0	275	79		Mixed	DNA	Germline DNA	ERCC2	Genotype	275	OS	multivariable	HR	1.66	1.15	2	<0.01	Cisplatin
	32546699	132	Retrospective	109	23	66	42	0	0	0	132	15		Primary	DNA	Tumor	ERCC2	rs1799793-1 status	132	OS	univariable	HR	0.42	0.234	0.7	0	Cisplatin
	32546699	132	Retrospective	109	23	66	42	0	0	0	132	15		Primary	DNA	Tumor	ERCC2	rs1799793-1 status	132	OS	multivariable	HR	0.42	0.233	0.7	0	Cisplatin
	32546699	132	Retrospective	109	23	66	42	0	0	0	132	15		Primary	DNA	Tumor	ERCC2	rs1799793-1 status	132	LRC	univariable	HR	0.44	0.228	0.8	0.01	Cisplatin
	32546699	132	Retrospective	109	23	66	42	0	0	0	132	15		Primary	DNA	Tumor	ERCC2	rs13181-2 status	132	OS	univariable	HR	2.07	1.77	4	0.02	Cisplatin
	32546699	132	Retrospective	109	23	66	42	0	0	0	132	15		Primary	DNA	Tumor	ERCC2	rs13181-2 status	132	LRC	univariable	HR	1.97	1.054	4	0.03	Cisplatin
	32546699	132	Retrospective	109	23	66	42	0	0	0	132	15		Primary	DNA	Tumor	ERCC2	rs1799793-1 status	132	OS	multivariable	HR	0.48	0.251	0.9	0.03	Cisplatin
	32546699	132	Retrospective	109	23	66	42	0	0	0	132	15		Primary	DNA	Tumor	ERCC2	rs17655-1 status	132	LRC	multivariable	HR	0.56	0.325	1	0.04	Cisplatin
	22076708	531	Prospective randomized trial	420	111	25	0	443	63	330	201		64	Mixed	DNA	Tumor	ERCC2	SNP rs13181 presence	531	DFS	multivariable	aHR (additive model)	0.8	0.64	1	0.05	Cisplatin
	32546699	132	Retrospective	109	23	66	42	0	0	0	132	15		Primary	DNA	Tumor	ERCC2	rs17655-1 status	132	LRC	univariable	HR	0.63	0.368	1	0.09	Cisplatin
	22076708	531	Prospective randomized trial	420	111	25	0	443	63	330	201		64	Mixed	DNA	Tumor	ERCC2	SNP rs13181 presence	531	OS	multivariable	Global Wald test (co-dominant model)				0.11	Cisplatin
	22076708	531	Prospective randomized trial	420	111	25	0	443	63	330	201		64	Mixed	DNA	Tumor	ERCC2	SNP rs1799793 presence	531	OS	multivariable	Global Wald test (co-dominant model)				0.12	Cisplatin
	22076708	531	Prospective randomized trial	420	111	25	0	443	63	330	201		64	Mixed	DNA	Tumor	ERCC2	SNP rs13181 presence	531	DFS	multivariable	Global Wald test (co-dominant model)				0.13	Cisplatin
	22076708	531	Prospective randomized trial	420	111	25	0	443	63	330	201		64	Mixed	DNA	Tumor	ERCC2	SNP rs13181 presence	531	OS	multivariable	aHR (additive model)	0.86	0.71	1	0.15	Cisplatin
	22076708	531	Prospective randomized trial	420	111	25	0	443	63	330	201		64	Mixed	DNA	Tumor	ERCC2	SNP rs1799793 presence	531	OS	multivariable	aHR (additive model)	0.89	0.73	1	0.29	Cisplatin
	22076708	531	Prospective randomized trial	420	111	25	0	443	63	330	201		64	Mixed	DNA	Tumor	ERCC2	SNP rs1799793 presence	531	DFS	multivariable	aHR (additive model)	0.89	0.72	1	0.32	Cisplatin
	32546699	132	Retrospective	109	23	66	42	0	0	0	132	15		Primary	DNA	Tumor	ERCC2	rs17655-2 status	132	LRC	univariable	HR	0.37			0.32	Cisplatin
	22076708	531	Prospective randomized trial	420	111	25	0	443	63	330	201		64	Mixed	DNA	Tumor	ERCC2	SNP rs1799793 presence	531	DFS	multivariable	Global Wald test (co-dominant model)				0.52	Cisplatin
	32546699	132	Retrospective	109	23	66	42	0	0	0	132	15		Primary	DNA	Tumor	ERCC2	rs1799793-2 status	132	LRC	univariable	HR	1.25	0.587	3	0.57	Cisplatin
	22076708	531	Prospective randomized trial	420	111	25	0	443	63	330	201		64	Mixed	DNA	Tumor	ERCC4	SNP rs1799801 presence	531	DFS	multivariable	Global Wald test (co-dominant model)				0.1
	22076708	531	Prospective randomized trial	420	111	25	0	443	63	330	201		64	Mixed	DNA	Tumor	ERCC4	SNP rs1799801 presence	531	OS	multivariable	Global Wald test (co-dominant model)				0.25
	22076708	531	Prospective randomized trial	420	111	25	0	443	63	330	201		64	Mixed	DNA	Tumor	ERCC4	SNP rs1799801 presence	531	DFS	multivariable	aHR (additive model)	0.96	0.77	1	0.75
	22076708	531	Prospective randomized trial	420	111	25	0	443	63	330	201		64	Mixed	DNA	Tumor	ERCC4	SNP rs1799801 presence	531	OS	multivariable	aHR (additive model)	1.02	0.83	1	0.82
	22076708	531	Prospective randomized trial	420	111	25	0	443	63	330	201		64	Mixed	DNA	Tumor	ERCC5	SNP rs17655 presence	531	DFS	multivariable	aHR (additive model)	0.85	0.66	1	0.21
	22076708	531	Prospective randomized trial	420	111	25	0	443	63	330	201		64	Mixed	DNA	Tumor	ERCC5	SNP rs1047768 presence	531	DFS	multivariable	Global Wald test (co-dominant model)				0.31
	22076708	531	Prospective randomized trial	420	111	25	0	443	63	330	201		64	Mixed	DNA	Tumor	ERCC5	SNP rs17655 presence	531	OS	multivariable	aHR (additive model)	0.89	0.7	1	0.33
	22076708	531	Prospective randomized trial	420	111	25	0	443	63	330	201		64	Mixed	DNA	Tumor	ERCC5	SNP rs17655 presence	531	DFS	multivariable	Global Wald test (co-dominant model)				0.44
	22076708	531	Prospective randomized trial	420	111	25	0	443	63	330	201		64	Mixed	DNA	Tumor	ERCC5	SNP rs1047768 presence	531	DFS	multivariable	aHR (additive model)	1.06	0.86	1	0.59
	22076708	531	Prospective randomized trial	420	111	25	0	443	63	330	201		64	Mixed	DNA	Tumor	ERCC5	SNP rs17655 presence	531	OS	multivariable	Global Wald test (co-dominant model)				0.61
	22076708	531	Prospective randomized trial	420	111	25	0	443	63	330	201		64	Mixed	DNA	Tumor	ERCC5	SNP rs1047768 presence	531	OS	multivariable	aHR (additive model)	1.03	0.85	1	0.77
	22076708	531	Prospective randomized trial	420	111	25	0	443	63	330	201		64	Mixed	DNA	Tumor	ERCC5	SNP rs1047768 presence	531	OS	multivariable	Global Wald test (co-dominant model)				0.8
	23564498	40	Retrospective	22	18	2	1	12	25			2.5		Mixed	DNA	Tumor	FGFR4	Gly388Arg SNP presence	40	OS	univariable	Log-rank	better			0.01
	22076708	531	Prospective randomized trial	420	111	25	0	443	63	330	201		64	Mixed	DNA	Tumor	FGFR4	SNP rs351855 presence	531	DFS	multivariable	aHR (additive model)	0.89	0.71	1	0.33
	22076708	531	Prospective randomized trial	420	111	25	0	443	63	330	201		64	Mixed	DNA	Tumor	FGFR4	SNP rs351855 presence	531	OS	multivariable	aHR (additive model)	0.9	0.72	1	0.37
	22076708	531	Prospective randomized trial	420	111	25	0	443	63	330	201		64	Mixed	DNA	Tumor	FGFR4	SNP rs351855 presence	531	DFS	multivariable	Global Wald test (co-dominant model)				0.62
	22076708	531	Prospective randomized trial	420	111	25	0	443	63	330	201		64	Mixed	DNA	Tumor	FGFR4	SNP rs351855 presence	531	OS	multivariable	Global Wald test (co-dominant model)				0.67
	26245169	61	Retrospective	51	9	35	18	0	0	7	54	100	70	Primary	DNA	Tumor	HIF1A	rs2057482	61	OS	univariable	Log-rank	worse			0.04
	26245169	61	Retrospective	51	9	35	18	0	0	7	54	100	70	Primary	DNA	Tumor	HIF1A	rs2057482	61	PFS	univariable	Log-rank	worse			0.19
	26245169	61	Retrospective	51	9	35	18	0	0	7	54	100	70	Primary	DNA	Tumor	HIF-1alpha + XRCC5	Mutation status	61	OS	univariable	Log-rank	better			0.05
	26245169	61	Retrospective	51	9	35	18	0	0	7	54	100	70	Primary	DNA	Tumor	HIF-1alpha + XRCC5	Mutation status	61	PFS	univariable	Log-rank	equal			0.16
	33327591	69	Retrospective	59	10	29		36		0	69	44.9	54	Mixed	DNA	Germline DNA	ITGAM	-323 G>A genotype	69	OS	multivariable	HR	3.01	1.07	8	0.04
	23737793	195	Self-proclaimed prospective	150	45	123	11	29	21			99.5		Mixed	DNA	Tumor	KRAS	Mutation status, codon 12/13	195	LRC	univariable	Log-rank	worse			0.03	Sotorasib, Cetuximab, Cetuximab + Chemotherapy, Panitumumab, Panitumumab + Chemotherapy, Cobimetinib, Trametinib, Adagrasib, Adagrasib + Cetuximab, Adagrasib
	28006059	413	Prospective randomized trial	366	47	298			0	0	413	100		Primary	DNA	Germline DNA	KRAS	Mutation status	413	PFS	multivariable	HR	2.59	0.91	7	0.07	Sotorasib, Cetuximab, Cetuximab + Chemotherapy, Panitumumab, Panitumumab + Chemotherapy, Cobimetinib, Trametinib, Adagrasib, Adagrasib + Cetuximab, Adagrasib
	23737793	195	Self-proclaimed prospective	150	45	123	11	29	21			99.5		Mixed	DNA	Tumor	KRAS	Mutation status, codon 12/13	195	DFS	univariable	Log-rank	worse			0.12	Sotorasib, Cetuximab, Cetuximab + Chemotherapy, Panitumumab, Panitumumab + Chemotherapy, Cobimetinib, Trametinib, Adagrasib, Adagrasib + Cetuximab, Adagrasib
	23737793	195	Self-proclaimed prospective	150	45	123	11	29	21			99.5		Mixed	DNA	Tumor	KRAS	Mutation status, codon 12/13	195	OS	univariable	Log-rank	worse			0.14	Sotorasib, Cetuximab, Cetuximab + Chemotherapy, Panitumumab, Panitumumab + Chemotherapy, Cobimetinib, Trametinib, Adagrasib, Adagrasib + Cetuximab, Adagrasib
	28006059	413	Prospective randomized trial	366	47	298			0	0	413	100		Primary	DNA	Germline DNA	KRAS	Mutation status	413	OS	multivariable	HR	0.22	0.03	2	0.14	Sotorasib, Cetuximab, Cetuximab + Chemotherapy, Panitumumab, Panitumumab + Chemotherapy, Cobimetinib, Trametinib, Adagrasib, Adagrasib + Cetuximab, Adagrasib
	28006059	413	Prospective randomized trial	366	47	298			0	0	413	100		Primary	DNA	Germline DNA	KRAS	Mutation status	413	OS	multivariable	HR	2.48	0.64	10	0.19	Sotorasib, Cetuximab, Cetuximab + Chemotherapy, Panitumumab, Panitumumab + Chemotherapy, Cobimetinib, Trametinib, Adagrasib, Adagrasib + Cetuximab, Adagrasib
	23737793	195	Self-proclaimed prospective	150	45	123	11	29	21			99.5		Mixed	DNA	Tumor	KRAS	Mutation status, codon 12/13	195	DMFS	univariable	Log-rank	better			0.3	Sotorasib, Cetuximab, Cetuximab + Chemotherapy, Panitumumab, Panitumumab + Chemotherapy, Cobimetinib, Trametinib, Adagrasib, Adagrasib + Cetuximab, Adagrasib
	28006059	413	Prospective randomized trial	366	47	298			0	0	413	100		Primary	DNA	Germline DNA	KRAS	Mutation status	413	PFS	multivariable	HR	0.89	0.34	2	0.82	Sotorasib, Cetuximab, Cetuximab + Chemotherapy, Panitumumab, Panitumumab + Chemotherapy, Cobimetinib, Trametinib, Adagrasib, Adagrasib + Cetuximab, Adagrasib
	22356895	140	Retrospective	117	23	36	40	30	26	0	140	100	70	Primary	DNA	Tumor	MDM2	SNP 309 status	140	OS	multivariable	HR	3.24	1.9	6	<0.001
	22076708	531	Prospective randomized trial	420	111	25	0	443	63	330	201		64	Mixed	DNA	Tumor	MMP3	SNP rs35068180 presence	531	OS	multivariable	Global Wald test (co-dominant model)				0.59
	22076708	531	Prospective randomized trial	420	111	25	0	443	63	330	201		64	Mixed	DNA	Tumor	MMP3	SNP rs35068180 presence	531	DFS	multivariable	Global Wald test (co-dominant model)				0.63
	22076708	531	Prospective randomized trial	420	111	25	0	443	63	330	201		64	Mixed	DNA	Tumor	MMP3	SNP rs35068180 presence	531	DFS	multivariable	aHR (additive model)	1.03	0.83	1	0.81
	22076708	531	Prospective randomized trial	420	111	25	0	443	63	330	201		64	Mixed	DNA	Tumor	MMP3	SNP rs35068180 presence	531	OS	multivariable	aHR (additive model)	0.98	0.8	1	0.82
	22076708	531	Prospective randomized trial	420	111	25	0	443	63	330	201		64	Mixed	DNA	Tumor	MSH2	SNP rs2303426 presence	531	DFS	multivariable	aHR (additive model)	0.9	0.72	1	0.32
	22076708	531	Prospective randomized trial	420	111	25	0	443	63	330	201		64	Mixed	DNA	Tumor	MSH2	SNP rs2303426 presence	531	DFS	multivariable	Global Wald test (co-dominant model)				0.56
	22076708	531	Prospective randomized trial	420	111	25	0	443	63	330	201		64	Mixed	DNA	Tumor	MSH2	SNP rs2303426 presence	531	OS	multivariable	aHR (additive model)	0.95	0.78	1	0.65
	22076708	531	Prospective randomized trial	420	111	25	0	443	63	330	201		64	Mixed	DNA	Tumor	MSH2	SNP rs2303426 presence	531	OS	multivariable	Global Wald test (co-dominant model)				0.85
	22356895	140	Retrospective	117	23	36	40	30	26	0	140	100	70	Primary	DNA	Tumor	TP53	SNP 72 status	140	OS		Log-rank	better			0.22
	32296588	115	Retrospective	8	30	23	1	2	5	3	35	100			DNA	Tumor	PIK3CA	Mutation status	115	PFS	multivariable	HR	2.12	0.63	7	0.22	Alpelisib + Fulvestrant
	27036135	37	Retrospective			3	8	9	17				60	Adjuvant	DNA	Tumor	PTK2	Copy number alteration	37	DFS	multivariable	HR	2.07	1.71	4	0.01
	27036135	44	Retrospective			6	9	4	25				60	Adjuvant	DNA	Tumor	PTK2	Copy number alteration	44	DFS	multivariable	HR	1.67	1.05	3	0.03
	32296588	115	Retrospective	8	30	23	1	2	5	3	35	100			DNA	Tumor	KRAS	Mutation status	115	PFS	multivariable	HR	1.96	0.73	5	0.17	Sotorasib, Cetuximab, Cetuximab + Chemotherapy, Panitumumab, Panitumumab + Chemotherapy, Cobimetinib, Trametinib, Adagrasib, Adagrasib + Cetuximab, Adagrasib
	32296588	115	Retrospective	8	30	23	1	2	5	3	35	100			DNA	Tumor	KRAS	Mutation status	115	PFS	multivariable	HR	1.34	0.31	6	0.69	Sotorasib, Cetuximab, Cetuximab + Chemotherapy, Panitumumab, Panitumumab + Chemotherapy, Cobimetinib, Trametinib, Adagrasib, Adagrasib + Cetuximab, Adagrasib
	29802455	62	Self-proclaimed prospective	51	11	17	45	34		2	60	43.5	66	Mixed	DNA	Germline DNA	TNF	-1031T/C genotype	62	OS	multivariable	HR	2.142	1.124	4	0.021
	31076897	62	Retrospective	51	11			34	0	2	60	38.7	66	Mixed	DNA	Germline DNA	TNF	-1211 genotype	62	OS	multivariable	HR	6.84	1.24	38	0.03
	32561252	60	Retrospective	49	11	12	11	33	0	1	59	40	54	Mixed	DNA	Germline DNA	TNFRSF1A	135 T>C genotype	60	OS	multivariable	HR	2.78	0.92	27	0.03
	22090360	74	Retrospective			8	18	16	32				62	Adjuvant	DNA	Tumor	TP53	Mutation status	74	LRR	multivariable	Cox regression				0
	22090360	74	Retrospective			8	18	16	32				62	Adjuvant	DNA	Tumor	TP53	Mutation status	74	LRR	multivariable	Cox regression				0.01
	22076708	531	Prospective randomized trial	420	111	25	0	443	63	330	201		64	Mixed	DNA	Tumor	TP53	SNP rs1042522 presence	531	DFS	multivariable	aHR (additive model)	1.28	1.02	2	0.03
	22076708	531	Prospective randomized trial	420	111	25	0	443	63	330	201		64	Mixed	DNA	Tumor	TP53	SNP rs1042522 presence	531	DFS	multivariable	Global Wald test (co-dominant model)				0.09
	22076708	531	Prospective randomized trial	420	111	25	0	443	63	330	201		64	Mixed	DNA	Tumor	TP53	SNP rs1042522 presence	531	OS	multivariable	aHR (additive model)	1.05	0.84	1	0.68
	22076708	531	Prospective randomized trial	420	111	25	0	443	63	330	201		64	Mixed	DNA	Tumor	TP53	SNP rs1042522 presence	531	OS	multivariable	Global Wald test (co-dominant model)				0.84
	22090360	74	Retrospective			8	18	16	32				62	Adjuvant	DNA	Tumor	TP53	Mutation status	74	LRR	univariable	Log-rank	ns			0.9
	25456005	40	Retrospective	22	18	0	1	12	27			2.5	50	Mixed	DNA	Tumor	WRAP53	rs2287499 and rs2287498 status	40	OS	univariable	Log-rank	equal			0.83
	22076708	531	Prospective randomized trial	420	111	25	0	443	63	330	201		64	Mixed	DNA	Tumor	XPA	SNP rs1800975 presence	531	DFS	multivariable	aHR (additive model)	1.1	0.88	1	0.4
	22076708	531	Prospective randomized trial	420	111	25	0	443	63	330	201		64	Mixed	DNA	Tumor	XPA	SNP rs1800975 presence	531	DFS	multivariable	Global Wald test (co-dominant model)				0.49
	22076708	531	Prospective randomized trial	420	111	25	0	443	63	330	201		64	Mixed	DNA	Tumor	XPA	SNP rs1800975 presence	531	OS	multivariable	Global Wald test (co-dominant model)				0.9
	22076708	531	Prospective randomized trial	420	111	25	0	443	63	330	201		64	Mixed	DNA	Tumor	XPA	SNP rs1800975 presence	531	OS	multivariable	aHR (additive model)	0.96	0.78	1	0.96
	23564498	40	Retrospective	22	18	2	1	12	25			2.5		Mixed	DNA	Tumor	ERCC2	Mutation status (Lys751Gln)	40	OS	univariable	Log-rank	worse			0.05	Cisplatin
	21737503	80	Retrospective	63	17	31	5	13	27	17	62	88		Mixed	DNA	Tumor	ERCC4	Mutation status	80	PFS		HR	range: 1.41 - 2.3			>0.05
	22076708	531	Prospective randomized trial	420	111	25	0	443	63	330	201		64	Mixed	DNA	Tumor	XRCC1	SNP rs25487 presence	531	OS	multivariable	aHR (additive model)	1.28	1.05	2	0.02
	22076708	531	Prospective randomized trial	420	111	25	0	443	63	330	201		64	Mixed	DNA	Tumor	XRCC1	SNP rs25487 presence	531	OS	multivariable	Global Wald test (co-dominant model)				0.03
	29893275	101	Prospective Cohort	90	11	52	12	26	11	0	101	100	66	Primary	DNA	Germline DNA	XRCC1	Arg194Trp genotype	101	PFS	univariable	HR	0.59	0.34	1	0.08
	29893275	101	Prospective Cohort	90	11	52	12	26	11	0	101	100	66	Primary	DNA	Germline DNA	XRCC1	Arg194Trp genotype	101	LFFS	univariable	HR	0.59	0.34	1	0.09
	29893275	101	Prospective Cohort	90	11	52	12	26	11	0	101	100	66	Primary	DNA	Germline DNA	XRCC1	Arg194Trp genotype	101	OS	univariable	HR	0.6	0.32	1	0.14
	22076708	531	Prospective randomized trial	420	111	25	0	443	63	330	201		64	Mixed	DNA	Tumor	XRCC1	SNP rs25487 presence	531	DFS	multivariable	Global Wald test (co-dominant model)				0.6
	31749055	225	Retrospective	200	25	67	86	72	0	88	137		66.6	Primary	DNA	Germline DNA	XRCC1	Arg399Gln polymorphism presence	225	OS	univariable	HR	1.16	0.48	3	0.75
	29893275	101	Prospective Cohort	90	11	52	12	26	11	0	101	100	66	Primary	DNA	Germline DNA	XRCC1	Arg194Trp genotype	101	DMFS	univariable	HR	0.87	0.29	3	0.81
	22076708	531	Prospective randomized trial	420	111	25	0	443	63	330	201		64	Mixed	DNA	Tumor	XRCC1	SNP rs25487 presence	531	DFS	multivariable	aHR (additive model)	1.01	0.82	1	0.92
	22076708	531	Prospective randomized trial	420	111	25	0	443	63	330	201		64	Mixed	DNA	Tumor	XRCC3	SNP rs861539 presence	531	OS	multivariable	aHR (additive model)	1.08	0.9	1	0.41
	22076708	531	Prospective randomized trial	420	111	25	0	443	63	330	201		64	Mixed	DNA	Tumor	XRCC3	SNP rs861539 presence	531	DFS	multivariable	aHR (additive model)	0.96	0.78	1	0.65
	22076708	531	Prospective randomized trial	420	111	25	0	443	63	330	201		64	Mixed	DNA	Tumor	XRCC3	SNP rs861539 presence	531	OS	multivariable	Global Wald test (co-dominant model)				0.69
	22076708	531	Prospective randomized trial	420	111	25	0	443	63	330	201		64	Mixed	DNA	Tumor	XRCC3	SNP rs861539 presence	531	DFS	multivariable	Global Wald test (co-dominant model)				0.78
	26245169	61	Retrospective	51	9	35	18	0	0	7	54	100	70	Primary	DNA	Tumor	XRCC5	rs207906 status	61	PFS	univariable	Log-rank	better			0.04
	26245169	61	Retrospective	51	9	35	18	0	0	7	54	100	70	Primary	DNA	Tumor	XRCC5	rs207906 status	61	OS	univariable	Log-rank	better			0.16
DNA/Epigenetic
	23482805	84	Prospective Cohort	60	24	0	0	9	62	33	51		50	Adjuvant	Other	Tumor	FANCC	Mutation status	84	LRR	multivariable	HR	6.6	2.48	18	0.0002
	23482805	84	Prospective Cohort	60	24	0	0	9	62	33	51		50	Adjuvant	Other	Tumor	PTCH1	Mutation status	84	LRR	multivariable	HR	5.98	2.37	15	0.0001	Sonidegib, Vismodegib
Epigenetic
	26304463	82	Self-proclaimed prospective	65	17	9	10	20	42	24	54			Adjuvant	Other	Tumor	PAX5	Methylation	82	LRFS	multivariable	HR	0.53	0.03	4	0.55
Hematological marker
	31684119	122	Retrospective	93	29	58	20	14	32	39	83	12	40	Adjuvant	Hematological marker	Blood	COP (Perioperative platelet count)	Count (1 day postoperative)	122	DFS	multivariable	HR	0.69	0.52	0.9	0.01
	31684119	122	Retrospective	93	29	58	20	14	32	39	83	12	40	Adjuvant	Hematological marker	Blood	COP (Perioperative platelet count)	Count (1 day postoperative)	122	OS	multivariable	HR	0.76	0.6	0.9	0.02
	31684119	122	Retrospective	93	29	58	20	14	32	39	83	12	40	Adjuvant	Hematological marker	Blood	COP (Perioperative platelet count)	Count (1 week postoperative)	122	DFS	multivariable	HR	0.81	0.66	1	0.05
	31684119	122	Retrospective	93	29	58	20	14	32	39	83	12	40	Adjuvant	Hematological marker	Blood	COP (Perioperative platelet count)	Count (1 week postoperative)	122	OS	multivariable	HR	0.89	0.76	1	0.17
	21932027	170	Retrospective	136	34	112	14	20	24	0	170	55	60	Mixed	Hematological marker	Blood	hemoglobin	Pretreatment level	170	OS	multivariable	HR	2.15	1.33	3	0.002
	23748230	157	Retrospective	120	37	64	23	38	32		157	43	60	Adjuvant	Hematological marker	Blood	hemoglobin	Pretreatment level	157	OS	multivariable	HR	2.47	1.25	5	0.01
	23959264	163	Retrospective	124	39	69	22	39	33			47	60	Adjuvant	Hematological marker	Blood	hemoglobin	Pretreatment level	163	LRC	multivariable	HR	2.22	1.19	4	0.01
	23959264	163	Retrospective	124	39	69	22	39	33			47	60	Adjuvant	Hematological marker	Blood	hemoglobin	Pretreatment level	163	OS	multivariable	HR	2.13	1.19	4	0.01
	24928249	160	Retrospective	124	36	64	23	39	34	0	160	42	60	Adjuvant	Hematological marker	Blood	hemoglobin	Pretreatment level	160	OS	multivariable	HR	2.44	1.27	5	0.01
	25230150	114	Retrospective	86	28	0	25	89	0			71.9	58	Primary	Hematological marker	Blood	hemoglobin	Pretreatment level	114	DSS	univariable	Log-rank	worse			0.01
	31906998	184	Retrospective	143	41	78	35	37	34	9	175	90.2		Primary	Hematological marker	Blood	hemoglobin	blood level	184	OS	univariable	HR	0.88	0.8	1	0.01
	21932027	170	Retrospective	136	34	112	14	20	24	0	170	55	60	Mixed	Hematological marker	Blood	hemoglobin	Pretreatment level	170	LRC	multivariable	HR	1.88	1.11	3	0.02
	31906998	184	Retrospective	143	41	78	35	37	34	9	175	90.2		Primary	Hematological marker	Blood	hemoglobin	blood level	184	DSS	univariable	HR	0.84	0.73	1	0.02
	31906998	184	Retrospective	143	41	78	35	37	34	9	175	90.2		Primary	Hematological marker	Blood	hemoglobin	blood level	184	DFS	univariable	HR	0.9	0.82	1	0.02
	21932027	170	Retrospective	136	34	112	14	20	24	0	170	55	60	Mixed	Hematological marker	Blood	hemoglobin	Pretreatment level	170	DMFS	multivariable	HR	1.98	1.03	4	0.04
	24928249	160	Retrospective	124	36	64	23	39	34	0	160	42	60	Adjuvant	Hematological marker	Blood	hemoglobin	Pretreatment level	160	LRC	multivariable	HR	2.03	1.04	4	0.04
	30073209	193	Retrospective	154	39	135	21	29	8			100	70	Primary	Hematological marker	Blood	hemoglobin	Pretreatment level	193	DMFS	multivariable	HR	2.23	1.01	5	0.05
	31906998	184	Retrospective	143	41	78	35	37	34	9	175	90.2		Primary	Hematological marker	Blood	hemoglobin	blood level	184	LRF	univariable	HR	0.86	0.74	1	0.05
	25230150	114	Retrospective	86	28	0	25	89	0			71.9	58	Primary	Hematological marker	Blood	hemoglobin	Pretreatment level	114	LRC	univariable	Log-rank	worse			0.07
	25868613	151	Retrospective	115	36	62	22	36	31	0	151	46	60	Adjuvant	Hematological marker	Blood	hemoglobin	Pretreatment level	151	OS	multivariable	HR	1.76	0.94	3	0.08
	31906998	184	Retrospective	143	41	78	35	37	34	9	175	90.2		Primary	Hematological marker	Blood	hemoglobin	blood level	184	LF	univariable	HR	0.87	0.74	1	0.08
	31906998	184	Retrospective	143	41	78	35	37	34	9	175	90.2		Primary	Hematological marker	Blood	hemoglobin	blood level	184	AFR	univariable	HR	0.89	0.77	1	0.09
	30073209	193	Retrospective	154	39	135	21	29	8			100	70	Primary	Hematological marker	Blood	hemoglobin	Pretreatment level	193	PFS	multivariable	HR	1.54	0.94	3	0.1
	30073209	193	Retrospective	154	39	135	21	29	8			100	70	Primary	Hematological marker	Blood	hemoglobin	Pretreatment level	193	OS	multivariable	HR	1.54	0.9	3	0.12
	25230150	114	Retrospective	86	28	0	25	89	0			71.9	58	Primary	Hematological marker	Blood	hemoglobin	Pretreatment level	114	LRC	univariable	Log-rank	worse			0.14
	23748230	157	Retrospective	120	37	64	23	38	32		157	43	60	Adjuvant	Hematological marker	Blood	hemoglobin	Pretreatment level	157	LRC	multivariable	HR	1.77	0.81	4	0.15
	23959264	163	Retrospective	124	39	69	22	39	33			47	60	Adjuvant	Hematological marker	Blood	hemoglobin	Pretreatment level	163	DMFS	univariable	Log-rank	worse			0.16
	25868613	151	Retrospective	115	36	62	22	36	31	0	151	46	60	Adjuvant	Hematological marker	Blood	hemoglobin	Pretreatment level	151	LRC	multivariable	HR	1.64	0.82	3	0.16
	24928249	160	Retrospective	124	36	64	23	39	34	0	160	42	60	Adjuvant	Hematological marker	Blood	hemoglobin	Pretreatment level	160	DMFS	univariable	Log-rank	equal			0.32
	20388242	60	Retrospective	43	17	60	0	0	0	15	45		54.7	Mixed	Hematological marker	Blood	hemoglobin	Level	60	DSS	multivariable	HR	0.85	0.38	2	0.35
	25230150	114	Retrospective	86	28	0	25	89	0			71.9	58	Primary	Hematological marker	Blood	hemoglobin	Pretreatment level	114	LRC	univariable	Log-rank	worse			0.42
	20388242	60	Retrospective	43	17	60	0	0	0	15	45		54.7	Mixed	Hematological marker	Blood	hemoglobin	Level	60	LRC	multivariable	HR	0.72	0.31	2	0.43
	30073209	193	Retrospective	154	39	135	21	29	8			100	70	Primary	Hematological marker	Blood	hemoglobin	Pretreatment level	193	LRC	multivariable	HR	1.26	0.64	3	0.5
	23748230	157	Retrospective	120	37	64	23	38	32		157	43	60	Adjuvant	Hematological marker	Blood	hemoglobin	Pretreatment level	157	DMFS	univariable	Log-rank	worse			0.53
	31906998	184	Retrospective	143	41	78	35	37	34	9	175	90.2		Primary	Hematological marker	Blood	hemoglobin	blood level	184	DRR	univariable	HR	0.95	0.79	1	0.55
	25868613	151	Retrospective	115	36	62	22	36	31	0	151	46	60	Adjuvant	Hematological marker	Blood	hemoglobin	Pretreatment level	151	DMFS	univariable	Log-rank	equal			0.79
	30073209	193	Retrospective	154	39	135	21	29	8			100	70	Primary	Hematological marker	Blood	Leucocytes	Pretreatment count	193	OS	multivariable	HR	2.02	1.23	3	0.01
	30073209	193	Retrospective	154	39	135	21	29	8			100	70	Primary	Hematological marker	Blood	Leucocytes	Pretreatment count	193	PFS	multivariable	HR	1.87	1.17	3	0.01
	30073209	193	Retrospective	154	39	135	21	29	8			100	70	Primary	Hematological marker	Blood	Leucocytes	Pretreatment count	193	DMFS	multivariable	HR	1.95	0.92	4	0.08
	30073209	193	Retrospective	154	39	135	21	29	8			100	70	Primary	Hematological marker	Blood	Leucocytes	Pretreatment count	193	LRC	multivariable	HR	1.37	0.7	3	0.35
	31684119	122	Retrospective	93	29	58	20	14	32	39	83	12	40	Adjuvant	Hematological marker	Blood	mean platelet volume / perioperative platelet count	Ratio (1 day postoperative)	122	OS	multivariable	HR	1.12	1.03	1	0.01
	31684119	122	Retrospective	93	29	58	20	14	32	39	83	12	40	Adjuvant	Hematological marker	Blood	mean platelet volume / perioperative platelet count	Ratio (1 day postoperative)	122	DFS	multivariable	HR	1.12	1.01	1	0.03
	31684119	122	Retrospective	93	29	58	20	14	32	39	83	12	40	Adjuvant	Hematological marker	Blood	mean platelet volume / perioperative platelet count	Ratio (1 week postoperative)	122	DFS	multivariable	HR	1.22	1.02	1	0.03
	31684119	122	Retrospective	93	29	58	20	14	32	39	83	12	40	Adjuvant	Hematological marker	Blood	mean platelet volume / perioperative platelet count	Ratio (1 week postoperative)	122	OS	multivariable	HR	1.12	0.96	1	0.15
	31684119	122	Retrospective	93	29	58	20	14	32	39	83	12	40	Adjuvant	Hematological marker	Blood	Mean platelet volume, 1 day postoperative	Volume	122	OS	multivariable	HR	0.88	0.65	1	0.42
	31684119	122	Retrospective	93	29	58	20	14	32	39	83	12	40	Adjuvant	Hematological marker	Blood	Mean platelet volume, 1 day postoperative	Volume	122	DFS	multivariable	HR	0.98	0.68	1	0.95
	31684119	122	Retrospective	93	29	58	20	14	32	39	83	12	40	Adjuvant	Hematological marker	Blood	Mean platelet volume, 1 week postoperative	Volume	122	OS	multivariable	HR	0.95	0.69	1	0.8
	31684119	122	Retrospective	93	29	58	20	14	32	39	83	12	40	Adjuvant	Hematological marker	Blood	Mean platelet volume, 1 week postoperative	Volume	122	DFS	multivariable	HR	1.02	0.69	2	0.88
	33160368	319	Retrospective	244	75	319	0	0	0				70	Mixed	Hematological marker	Blood	MPV (mean platelet volume)	Volume	319	CSS	multivariable	HR	0.77	0.63	0.9	0.01
	33160368	319	Retrospective	244	75	319	0	0	0				70	Mixed	Hematological marker	Blood	MPV (mean platelet volume)	Volume	319	LRC	multivariable	HR	0.8	0.65	1	0.03
	33160368	319	Retrospective	244	75	319	0	0	0				70	Mixed	Hematological marker	Blood	MPV (mean platelet volume)	Volume	319	RFS	multivariable	HR	0.83	0.685	1	0.05
	30073209	193	Retrospective	154	39	135	21	29	8			100	70	Primary	Hematological marker	Blood	Neutrophils	Pretreatment count	193	OS	univariable	Log-rank	worse			<0.001
	30073209	193	Retrospective	154	39	135	21	29	8			100	70	Primary	Hematological marker	Blood	Neutrophils	Pretreatment count	193	PFS	univariable	Log-rank	worse			<0.001
	30073209	193	Retrospective	154	39	135	21	29	8			100	70	Primary	Hematological marker	Blood	Neutrophils	Pretreatment count	193	DMFS	univariable	Log-rank	worse			0
	30073209	193	Retrospective	154	39	135	21	29	8			100	70	Primary	Hematological marker	Blood	Neutrophils	Pretreatment count	193	LRC	univariable	Log-rank	worse			0.08
	30400969	186	Retrospective	146	40	83	27	24	52	16	170	80		Mixed	Hematological marker	Blood	NLR	Ratio	186	OS	multivariable	HR	1.58	1.01	2	0.04
	30400969	186	Retrospective	146	40	83	27	24	52	16	170	80		Mixed	Hematological marker	Blood	NLR	Ratio	186	LRR	univariable	HR	1.49	0.83	3	0.18
	30400969	186	Retrospective	146	40	83	27	24	52	16	170	80		Mixed	Hematological marker	Blood	NLR	Ratio	186	DRR	univariable	HR	1.38	0.65	3	0.4
	33160368	319	Retrospective	244	75	319	0	0	0				70	Mixed	Hematological marker	Blood	Platelet count	count	319	LRC	multivariable	HR	1	1	1	0.12
	33160368	319	Retrospective	244	75	319	0	0	0				70	Mixed	Hematological marker	Blood	Platelet count	count	319	RFS	multivariable	HR	1	0.999	1	0.17
	33160368	319	Retrospective	244	75	319	0	0	0				70	Mixed	Hematological marker	Blood	Platelet count	count	319	CSS	multivariable	HR	1	0.999	1	0.43
	30400969	186	Retrospective	146	40	83	27	24	52	16	170	80		Mixed	Hematological marker	Blood	PLR	Ratio	186	OS	univariable	HR	1.62	0.99	3	0.05
	30400969	186	Retrospective	146	40	83	27	24	52	16	170	80		Mixed	Hematological marker	Blood	PLR	Ratio	186	LRR	univariable	HR	1.65	0.88	3	0.12
	30400969	186	Retrospective	146	40	83	27	24	52	16	170	80		Mixed	Hematological marker	Blood	PLR	Ratio	186	DRR	univariable	HR	1.44	0.65	3	0.37
Immune cells
	33901866	201	Retrospective	175	26	201	0	0	0			69.7	70	Primary	Immune cells	Blood	ALC (absolute lymph. count)	Count	201	PFS	univariable	HR	0.58	0.34	1	0.05
	33901866	201	Retrospective	175	26	201	0	0	0			69.7	70	Primary	Immune cells	Blood	ALC (absolute lymph. count)	Count	201	PFS	multivariable	HR	0.75	0.53	1	0.1
	33901866	201	Retrospective	175	26	201	0	0	0			69.7	70	Primary	Immune cells	Blood	ALC (absolute lymph. count)	Count	201	OS	univariable	HR	0.67	0.35	1	0.22
	33901866	201	Retrospective	175	26	201	0	0	0			69.7	70	Primary	Immune cells	Blood	ALC (absolute lymph. count)	Count	201	OS	univariable	HR	0.9	0.62	1	0.6
	29493423	136	Retrospective	104	32	62	16	22	36	43	93	47.1		Mixed	Immune cells	Tumor	CD163	count	136	OS	univariable	HR	ns			ns
	29493423	136	Retrospective	104	32	62	16	22	36	43	93	47.1		Mixed	Immune cells	Tumor	MS4A1	count	136	OS	univariable	HR	ns			ns
	29493423	136	Retrospective	104	32	62	16	22	36	43	93	47.1		Mixed	Immune cells	Tumor	CD3G	count	136	OS	univariable	HR	0.6	0.4	1	0.03
	26178914	161	Retrospective	131	30	98	26	0	41			100	60	Adjuvant	Immune cells	Tumor	CD3G	Infiltration level	161	OS	multivariable	HR	1.12	0.501	2	0.79
	26178914	161	Retrospective	131	30	98	26	0	41			100	60	Adjuvant	Immune cells	Tumor	CD3G	Infiltration level	161	LPFS	multivariable	HR	1.09	0.511	2	0.82
	26178914	161	Retrospective	131	30	98	26	0	41			100	60	Adjuvant	Immune cells	Tumor	CD3G	Infiltration level	161	DMFS	multivariable	HR	1.06	0.5	2	0.88
	29235112	145	Retrospective	122	23	87	20	0	38	0	145	100	66	Adjuvant	Immune cells	Tumor	NCAM1	count	145	OS	multivariable	HR	0.27	0.12	0.6	0
	29235112	145	Retrospective	122	23	87	20	0	38	0	145	100	66	Adjuvant	Immune cells	Tumor	NCAM1	count	145	DMFS	multivariable	HR	0.27	0.13	0.6	0
	29235112	145	Retrospective	122	23	87	20	0	38	0	145	100	66	Adjuvant	Immune cells	Tumor	NCAM1	count	145	LPFS	multivariable	HR	0.35	0.17	0.7	0.01
	31998639	197	Retrospective	55	142	85	78	34	0	2	195	100	70	Primary	Immune cells	Tumor	CD8A	Expression	197	OS	multivariable	HR	1.58	1.07	2	0.02
	31998639	197	Retrospective	55	142	85	78	34	0	2	195	100	70	Primary	Immune cells	Tumor	CD8A	Expression	197	PFS	multivariable	HR	1.71	1.01	3	0.05
	31998639	197	Retrospective	55	142	85	78	34	0	2	195	100	70	Primary	Immune cells	Tumor	CD8A	Expression	197	LRC	multivariable	HR	2.35	0.93	6	0.07
	31998639	197	Retrospective	55	142	85	78	34	0	2	195	100	70	Primary	Immune cells	Tumor	CD8A	Expression	197	DRR	multivariable	HR	1.99	0.7	6	0.2
	31998639	197	Retrospective	55	142	85	78	34	0	2	195	100	70	Primary	Immune cells	Tumor	CD8 pos. T cells / Treg ratio	Expression	197	DRR	multivariable	HR	2	0.94	4	0.07
	31998639	197	Retrospective	55	142	85	78	34	0	2	195	100	70	Primary	Immune cells	Tumor	CD8 pos. T cells / Treg ratio	Expression	197	PFS	multivariable	HR	1.34	0.92	2	0.12
	31998639	197	Retrospective	55	142	85	78	34	0	2	195	100	70	Primary	Immune cells	Tumor	CD8 pos. T cells / Treg ratio	Expression	197	LRC	multivariable	HR	1.55	0.86	3	0.14
	31998639	197	Retrospective	55	142	85	78	34	0	2	195	100	70	Primary	Immune cells	Tumor	CD8 pos. T cells / Treg ratio	Expression	197	OS	multivariable	HR	1.37	0.84	2	0.21
	28932643	77	Retrospective	61	16	51				0	77	100	70	Primary	Immune cells	Tumor	CD8A	count	77	PFS	multivariable	HR	0.3	0.1	0.7	0.01
	26178914	161	Retrospective	131	30	98	26	0	41			100	60	Adjuvant	Immune cells	Tumor	CD8A	Infiltration level	161	OS	multivariable	HR	0.31	0.121	0.8	0.02
	26178914	161	Retrospective	131	30	98	26	0	41			100	60	Adjuvant	Immune cells	Tumor	CD8A	Infiltration level	161	DMFS	multivariable	HR	0.38	0.161	0.9	0.03
	26178914	161	Retrospective	131	30	98	26	0	41			100	60	Adjuvant	Immune cells	Tumor	CD8A	Infiltration level	161	LPFS	multivariable	HR	0.4	0.167	0.9	0.04
	28932643	77	Retrospective	61	16	51				0	77	100	70	Primary	Immune cells	Tumor	CD8A	count	77	OS	multivariable	HR	0.4	0.2	1	0.07
	29493423	136	Retrospective	104	32	62	16	22	36	43	93	47.1		Mixed	Immune cells	Tumor	CD8A	count	136	OS	univariable	HR	ns			ns
	28932643	77	Retrospective	61	16	51				0	77	100	70	Primary	Immune cells	Tumor	CD8A	count	77	OS	univariable	HR	1.1			0.35
	28932643	77	Retrospective	61	16	51				0	77	100	70	Primary	Immune cells	Tumor	CD8A	count	77	PFS	univariable	HR	1.1			0.4
	28932643	77	Retrospective	61	16	51				0	77	100	70	Primary	Immune cells	Tumor	FOXP3	count	77	PFS	multivariable	HR	1.6	0.5	5	0.38
	28932643	77	Retrospective	61	16	51				0	77	100	70	Primary	Immune cells	Tumor	FOXP3	count	77	OS	multivariable	HR	1.2	0.4	4	0.79
	34268826	101	Retrospective	78	23	101	0	0	0	49	52		70	Primary	Immune cells	Blood	LMR	Count	101	OS	multivariable	HR	0.51	0.21	1	0.13
	24174270	22	Retrospective	15	7	5								Primary	Immune cells	Blood	Lymphocytes	total lymphoyte count, at 2 months	22	PFS	multivariable	HR	5.74	1	32	0.05
	30172455	95	Retrospective	76	19	63				0	95	100	70	Primary	Immune cells	Tumor	Macrophages	count, intraepithelial	95	PFS	multivariable	HR	2	1.02	4	0.04
	30172455	95	Retrospective	76	19	63				0	95	100	70	Primary	Immune cells	Tumor	Macrophages	count, intraepithelial	95	OS	multivariable	HR	2.2	0.98	5	0.06
	30172455	95	Retrospective	76	19	63				0	95	100	70	Primary	Immune cells	Tumor	Macrophages	M2 macrophages/total macrophages	95	OS	univariable	HR	0.7			0.36
	30172455	95	Retrospective	76	19	63				0	95	100	70	Primary	Immune cells	Tumor	Macrophages	count, stroma	95	OS	multivariable	HR	1.3	0.6	3	0.43
	30172455	95	Retrospective	76	19	63				0	95	100	70	Primary	Immune cells	Tumor	Macrophages	count, stroma	95	PFS	univariable	HR	1.2			0.45
	30172455	95	Retrospective	76	19	63				0	95	100	70	Primary	Immune cells	Tumor	Macrophages	M2 macrophages/total macrophages	95	PFS	univariable	HR	0.9			0.67
	30172455	95	Retrospective	76	19	63				0	95	100	70	Primary	Immune cells	Tumor	Macrophages	M2 macrophages in stroma	95	OS	univariable	HR	1			0.9
	30172455	95	Retrospective	76	19	63				0	95	100	70	Primary	Immune cells	Tumor	Macrophages	M2 macrophages in stroma	95	PFS	univariable	HR	1			0.99
	26892430	145	Retrospective	115	30	76	12	24	25	44	101	68	60	Mixed	Immune cells	Blood	Neutrophil-to-lymphocyte ratio	Ratio	145	OS	multivariable	HR	3.64	1.34	10	0.02
	26892430	145	Retrospective	115	30	76	12	24	25	44	101	98	60	Mixed	Immune cells	Blood	Neutrophil-to-lymphocyte ratio	Ratio	145	RFS	multivariable	HR	2.02	0.83	5	0.1
	31998639	197	Retrospective	55	142	85	78	34	0	2	195	100	70	Primary	Immune cells	Tumor	NCAM1	Expression	197	DRR	multivariable	HR	2.47	1.16	5	0.02
	31998639	197	Retrospective	55	142	85	78	34	0	2	195	100	70	Primary	Immune cells	Tumor	NCAM1	Expression	197	LRC	multivariable	HR	0.5	0.22	1	0.1
	31998639	197	Retrospective	55	142	85	78	34	0	2	195	100	70	Primary	Immune cells	Tumor	NCAM1	Expression	197	OS	multivariable	HR	1.45	0.88	2	0.14
	31998639	197	Retrospective	55	142	85	78	34	0	2	195	100	70	Primary	Immune cells	Tumor	NCAM1	Expression	197	PFS	multivariable	HR	1.31	0.79	2	0.3
	34268826	101	Retrospective	78	23	101	0	0	0	49	52		70	Primary	Immune cells	Blood	NLR	Ratio	101	OS	univariable	HR	1.77	0.79	4	0.16
	33901866	201	Retrospective	175	26	201	0	0	0			69.7	70	Primary	Immune cells	Blood	NLR (neutrophil-lymphocyte-ratio)	Ratio	201	OS	univariable	HR	1.04	1.015	1	0
	33901866	201	Retrospective	175	26	201	0	0	0			69.7	70	Primary	Immune cells	Blood	NLR (neutrophil-lymphocyte-ratio)	Ratio	201	PFS	univariable	HR	1.03	1.011	1	0
	33901866	201	Retrospective	175	26	201	0	0	0			69.7	70	Primary	Immune cells	Blood	NLR (neutrophil-lymphocyte-ratio)	Ratio	201	PFS	univariable	HR	1.66	1.03	3	0.04
	33901866	201	Retrospective	175	26	201	0	0	0			69.7	70	Primary	Immune cells	Blood	NLR (neutrophil-lymphocyte-ratio)	Ratio	201	OS	univariable	HR	1.49	0.86	3	0.16
	31998639	197	Retrospective	55	142	85	78	34	0	2	195	100	70	Primary	Immune cells	Tumor	T cell infiltration score	Expression	197	DRR	multivariable	HR	1.82	0.83	4	0.14
	31998639	197	Retrospective	55	142	85	78	34	0	2	195	100	70	Primary	Immune cells	Tumor	T cell infiltration score	Expression	197	OS	multivariable	HR	1.48	0.82	3	0.19
	31998639	197	Retrospective	55	142	85	78	34	0	2	195	100	70	Primary	Immune cells	Tumor	T cell infiltration score	Expression	197	LRC	multivariable	HR	1.4	0.79	2	0.25
	31998639	197	Retrospective	55	142	85	78	34	0	2	195	100	70	Primary	Immune cells	Tumor	T cell infiltration score	Expression	197	PFS	multivariable	HR	1.32	0.76	2	0.32
	33901866	201	Retrospective	175	26	201	0	0	0			69.7	70	Primary	Immune cells	Tumor	TIL	count	201	OS	univariable	HR	0.32	0.15	0.7	0.01
	33753155	39	Prospective Cohort	35	4	13	12	7	2			100	70	Primary	Immune cells	Tumor	TIL	count	39	LRC	multivariable	HR	0.31	0.114	0.8	0.02
	33901866	201	Retrospective	175	26	201	0	0	0			69.7	70	Primary	Immune cells	Tumor	TIL	count	201	PFS	univariable	HR	0.57	0.31	1	0.07
	24129245	101	Retrospective	80	21	44	26	5	24			100	70	Primary	Immune cells	Tumor	Tumor- infiltrating lymphocytes	CD3- positivity	101	OS	multivariable	HR	0.43	0.206	0.9	0.02
	24129245	101	Retrospective	80	21	44	26	5	24			100	70	Primary	Immune cells	Tumor	Tumor- infiltrating lymphocytes	CD3- positivity	101	DMFS	multivariable	HR	0.43	0.211	0.9	0.02
	24129245	101	Retrospective	80	21	44	26	5	24			100	70	Primary	Immune cells	Tumor	Tumor- infiltrating lymphocytes	CD8- positivity	101	OS	multivariable	HR	0.36	0.13	1	0.03
	24129245	101	Retrospective	80	21	44	26	5	24			100	70	Primary	Immune cells	Tumor	Tumor- infiltrating lymphocytes	CD8- positivity	101	DMFS	multivariable	HR	0.31	0.113	0.9	0.03
	24129245	101	Retrospective	80	21	44	26	5	24			100	70	Primary	Immune cells	Tumor	Tumor- infiltrating lymphocytes	CD3- positivity	101	PFS	multivariable	HR	0.49	0.248	1	0.04
	24129245	101	Retrospective	80	21	44	26	5	24			100	70	Primary	Immune cells	Tumor	Tumor- infiltrating lymphocytes	CD8- positivity	101	PFS	multivariable	HR	0.46	0.198	1	0.05
	24129245	101	Retrospective	80	21	44	26	5	24			100	70	Primary	Immune cells	Tumor	Tumor- infiltrating lymphocytes	CD3- positivity	101	LFFS	multivariable	HR	0.55	0.272	1	0.09
	24129245	101	Retrospective	80	21	44	26	5	24			100	70	Primary	Immune cells	Tumor	Tumor- infiltrating lymphocytes	CD8- positivity	101	LFFS	multivariable	HR	0.49	0.208	1	0.1
	24129245	101	Retrospective	80	21	44	26	5	24			100	70	Primary	Immune cells	Tumor	Tumor- infiltrating lymphocytes	CD4- positivity	101	OS	multivariable	HR	1.54	0.555	4	0.41
	24129245	101	Retrospective	80	21	44	26	5	24			100	70	Primary	Immune cells	Tumor	Tumor- infiltrating lymphocytes	CD4- positivity	101	DMFS	multivariable	HR	1.44	0.526	4	0.48
	24129245	101	Retrospective	80	21	44	26	5	24			100	70	Primary	Immune cells	Tumor	Tumor- infiltrating lymphocytes	CD4- positivity	101	LFFS	multivariable	HR	1.21	0.437	3	0.71
	24129245	101	Retrospective	80	21	44	26	5	24			100	70	Primary	Immune cells	Tumor	Tumor- infiltrating lymphocytes	CD4- positivity	101	PFS	multivariable	HR	1.12	0.403	3	0.83
Metabolite
	26728026	17	Prospective Cohort									88	60	Adjuvant	Other	Tumor	Lactate	Level	17	OS	univariable	Log-rank	worse			0.04
miRNA
	26057452	18	Retrospective	14	4	6	1	5	3			100	60	Primary	miRNA	Blood	MIR142	Expression	18	LRC	univariable	Log-rank				0.13
	28347920	78	Retrospective	62	16	78	0	0	0	0	78	100	67.2	Primary	miRNA	Tumor	MIR146A	Expression	78	OS	multivariable	HR	2.2	1.2	4	0.02
	28347920	78	Retrospective	62	16	78	0	0	0	0	78	100	67.2	Primary	miRNA	Tumor	MIR155	Expression	78	OS	multivariable	HR	1.9	1	4	0.05
	32266559	34	Prospective Cohort	31	3	1	7	5	21	0	34		70	Primary	miRNA	Saliva	MIR15A	Expression	34	LPFS	multivariable	HR	0.1	0.004	0.9	0.04
	32266559	34	Prospective Cohort	31	3	1	7	5	21	0	34		70	Primary	miRNA	Saliva	MIR15B	Expression	34	LPFS	multivariable	HR	0.44	0.02	3	0.46
	26057452	11	Retrospective	9	2	7	2	2	0			72.7	60	Primary	miRNA	Blood	MIR186	Expression	11	LRC	univariable	Log-rank				0.03
	26057452	18	Retrospective	14	4	6	1	5	3			100	60	Primary	miRNA	Blood	MIR186	Expression	18	PFS	univariable	Log-rank				0.17
	26057452	18	Retrospective	14	4	6	1	5	3			100	60	Primary	miRNA	Blood	MIR191	Expression	18	PFS	univariable	Log-rank				0
	26057452	18	Retrospective	14	4	6	1	5	3			100	60	Primary	miRNA	Blood	MIR191	Expression	18	OS	univariable	Log-rank				0
	26057452	18	Retrospective	14	4	6	1	5	3			100	60	Primary	miRNA	Blood	MIR191	Expression	18	LRC	univariable	Log-rank				0.13
	26057452	11	Retrospective	9	2	7	2	2	0			72.7	60	Primary	miRNA	Blood	MIR191	Expression	11	LRC	univariable	Log-rank				0.03
	26057452	18	Retrospective	14	4	6	1	5	3			100	60	Primary	miRNA	Blood	MIR191	Expression	18	PFS	univariable	Log-rank				0.03
	26057452	18	Retrospective	14	4	6	1	5	3			100	60	Primary	miRNA	Blood	MIR191	Expression	18	OS	univariable	Log-rank				0.13
	28347920	78	Retrospective	62	16	78	0	0	0	0	78	100	67.2	Primary	miRNA	Tumor	MIR200B	Expression	78	OS	multivariable	HR	1.4	0.8	3	0.26
	26057452	18	Retrospective	14	4	6	1	5	3			100	60	Primary	miRNA	Blood	MIR28	Expression	18	PFS	univariable	Log-rank				0.03
	26057452	18	Retrospective	14	4	6	1	5	3			100	60	Primary	miRNA	Blood	MIR28	Expression	18	LRC	univariable	Log-rank				0.07
	26057452	18	Retrospective	14	4	6	1	5	3			100	60	Primary	miRNA	Blood	MIR28	Expression	18	OS	univariable	Log-rank				0.09
	26057452	18	Retrospective	14	4	6	1	5	3			100	60	Primary	miRNA	Blood	MIR374B	Expression	18	PFS	univariable	Log-rank				0.04
	26057452	18	Retrospective	14	4	6	1	5	3			100	60	Primary	miRNA	Blood	MIR374B	Expression	18	OS	univariable	Log-rank				0.04
	26057452	11	Retrospective	9	2	7	2	2	0			72.7	60	Primary	miRNA	Blood	MIR374B	Expression	11	LRC	univariable	Log-rank				0.03
	26057452	18	Retrospective	14	4	6	1	5	3			100	60	Primary	miRNA	Blood	MIR425	Expression	18	PFS	univariable	Log-rank				0
	26057452	18	Retrospective	14	4	6	1	5	3			100	60	Primary	miRNA	Blood	MIR425	Expression	18	OS	univariable	Log-rank				0
	26057452	18	Retrospective	14	4	6	1	5	3			100	60	Primary	miRNA	Blood	MIR425	Expression	18	LRC	univariable	Log-rank				0.13
	26057452	18	Retrospective	14	4	6	1	5	3			100	60	Primary	miRNA	Blood	MIR574	Expression	18	PFS	univariable	Log-rank				0.03
	26057452	11	Retrospective	9	2	7	2	2	0			72.7	60	Primary	miRNA	Blood	MIR574	Expression	11	LRC	univariable	Log-rank				0.03
	26057452	18	Retrospective	14	4	6	1	5	3			100	60	Primary	miRNA	Blood	MIR574	Expression	18	LRC	univariable	Log-rank				0.07
	26057452	18	Retrospective	14	4	6	1	5	3			100	60	Primary	miRNA	Blood	MIR574	Expression	18	OS	univariable	Log-rank				0.09
	26057452	18	Retrospective	14	4	6	1	5	3			100	60	Primary	miRNA	Blood	MIR574	Expression	18	PFS	univariable	Log-rank				0.17
	26057452	11	Retrospective	9	2	7	2	2	0			72.7	60	Primary	miRNA	Blood	MIR142	Expression	11	PFS	univariable	Log-rank				0.02
	26057452	11	Retrospective	9	2	7	2	2	0			72.7	60	Primary	miRNA	Blood	MIR142	Expression	11	LRC	univariable	Log-rank				0.03
mRNA
	27465548	32	Retrospective	29	3	15	5	4	4	0	32	100	70	Primary	mRNA	Tumor	53BP1	Expression	32	OS	univariable	Log-rank	better			0.06
	27465548	32	Retrospective	29	3	15	5	4	4	0	32	100	70	Primary	mRNA	Tumor	53BP1	Expression	32	DSS	univariable	Log-rank	better			0.06
	31817870	91	Retrospective	61	30	51	20	7	13			100			mRNA	Tumor	ACLY	Expression	91	LRC	univariable	HR	4.17	1.35	13	0.01
	34904929	103	Mixed	73	30	54	23	12	13	13	89	83	64	Primary	mRNA	Tumor	ATG12	Expression	103	LRC	multivariable	Log-rank	better			0.03
	34904929	103	Mixed	73	30	54	23	12	13	13	89	83	64	Primary	mRNA	Tumor	ATG12	Expression	103	LC	multivariable	Log-rank	better			0.04
	34904929	103	Mixed	73	30	54	23	12	13	13	89	83	64	Primary	mRNA	Tumor	ATG12	Expression	103	OS		HR	2.35	1.043	5	ns
	29657990	152	Retrospective	127	25	46	15	8	83	5	147	36	56	Adjuvant	mRNA	Tumor	CD44	Expression	152	LRC	multivariable	Concordance index	0.63	0.53	0.7	0.01
	31998639	197	Retrospective	55	142	85	78	34	0	2	195	100	70	Primary	mRNA	Tumor	CD44	Expression	197	DRR	multivariable	HR	1.97	1.02	4	0.04
	31998639	197	Retrospective	55	142	85	78	34	0	2	195	100	70	Primary	mRNA	Tumor	CD44	Expression	197	LRC	multivariable	HR	2.03	1.02	4	0.04
	34999136	128	Retrospective	99	29	59	21	0	48	4	124	100	56	Adjuvant	mRNA	Tumor	CD44	Expression	128	LRC	multivariable	HR	2.09	1.2	4	0.07
	34999136	128	Retrospective	99	29	59	21	0	48	4	124	100	56	Adjuvant	mRNA	Tumor	CD44	Expression	128	OS	multivariable	HR	1.68	0.95	3	0.07
	31998639	197	Retrospective	55	142	85	78	34	0	2	195	100	70	Primary	mRNA	Tumor	CD44	Expression	197	PFS	multivariable	HR	1.52	0.92	3	0.1
	31998639	197	Retrospective	55	142	85	78	34	0	2	195	100	70	Primary	mRNA	Tumor	CD44	Expression	197	OS	multivariable	HR	1.46	0.88	2	0.14
	34911941	86	Retrospective	58	28	45	14	8	19	9	77	66		Adjuvant	mRNA	Tumor	CXCR2	Expression	86	DSS		HR	2.4	0.91	6	0.07
	27913065	158	Retrospective	133	25	80	51	0	27	0	158	100	68.4	Primary	mRNA	Tumor	MET	Expression	158	FFDM	univariable	HR	1.57	0.95	3	0.08	Crizotinib, Capmatinib, Tepotinib, Tepotinib, Capmatinib, Crizotinib
	29657990	152	Retrospective	127	25	46	15	8	83	5	147	36	56	Adjuvant	mRNA	Tumor	MET	Expression	152	LRC	multivariable	Concordance index	0.58	0.47	0.7	0.16	Crizotinib, Capmatinib, Tepotinib, Tepotinib, Capmatinib, Crizotinib
	27913065	158	Retrospective	133	25	80	51	0	27	0	158	100	68.4	Primary	mRNA	Tumor	MET	Expression	158	LRC	univariable	HR	0.98	0.73	1	0.9	Crizotinib, Capmatinib, Tepotinib, Tepotinib, Capmatinib, Crizotinib
	27913065	158	Retrospective	133	25	80	51	0	27	0	158	100	68.4	Primary	mRNA	Tumor	MET	Expression	158	OS	univariable	HR	1.01	0.77	1	0.94	Crizotinib, Capmatinib, Tepotinib, Tepotinib, Capmatinib, Crizotinib
	34999136	128	Retrospective	99	29	59	21	0	48	4	124	100	56	Adjuvant	mRNA	Tumor	molecular subtype (basal, mesenchymal, atypical, classical, unclassified)	Subtype	128	LRC	univariable	HR	3.98	1.84	9	<0.001
	34999136	128	Retrospective	99	29	59	21	0	48	4	124	100	56	Adjuvant	mRNA	Tumor	molecular subtype (basal, mesenchymal, atypical, classical, unclassified)	Subtype	128	OS	univariable	HR	2.01	1.08	4	0.03
	22422610	77	Retrospective	67	10					37	40	64	65	Primary	mRNA	Tumor	NFKB1	Expression	77	LR	multivariable	HR	4.36	1.8	11	0
	29594211	118	Retrospective	94	24								14	Mixed	mRNA	Tumor	P4HA1	Expression	118	OS	multivariable	HR	3.4			0.01
	29594211	118	Retrospective	94	24								14	Mixed	mRNA	Tumor	P4HA1	Expression	118	LRC	multivariable	HR	10.3			0.01
	29594211	118	Retrospective	94	24								14	Mixed	mRNA	Tumor	P4HA1	Expression	118	LRC	multivariable	HR	5.4			0.03
	29594211	118	Retrospective	94	24								14	Mixed	mRNA	Tumor	P4HA1	Expression	118	OS	multivariable	HR	1.9			0.16
	29594211	118	Retrospective	94	24								14	Mixed	mRNA	Tumor	P4HA1	Expression	118	OS	multivariable	HR	1.7			0.22
	29594211	118	Retrospective	94	24								14	Mixed	mRNA	Tumor	P4HA1	Expression	118	LRC	multivariable	HR	2.8			0.22
	28476872	97	Retrospective			11	17	20	49					Adjuvant	mRNA	Tumor	CD274	Expression	97	LRR	multivariable	HR	1.95	1.4	3	0
	28476872	97	Retrospective			11	17	20	49					Adjuvant	mRNA	Tumor	CD274	Expression	97	DSS	univariable	Log-rank	worse			0.03
	31998639	197	Retrospective	55	142	85	78	34	0	2	195	100	70	Primary	mRNA	Tumor	Proliferation	Expression	197	LRC	multivariable	HR	1.89	0.96	4	0.07
	31998639	197	Retrospective	55	142	85	78	34	0	2	195	100	70	Primary	mRNA	Tumor	Proliferation	Expression	197	OS	multivariable	HR	1.62	0.96	3	0.07
	25256272	98	Retrospective	88	10							49	70	Primary	mRNA	Tumor	PTGIS	Expression	98	CSS	univariable	Log-rank	worse			0.01
	25256272	98	Retrospective	88	10							49	70	Primary	mRNA	Tumor	PTGIS	Expression	98	LRFS	univariable	Log-rank	worse			0.01
	25256272	98	Retrospective	88	10							49	70	Primary	mRNA	Tumor	PTGIS	Expression	98	DMFS	univariable	Log-rank	worse			0.02
	25256272	98	Retrospective	88	10							49	70	Primary	mRNA	Tumor	PTGIS	Expression	98	CSS	multivariable	HR	3.9	1.26	12	0.02
	25256272	98	Retrospective	88	10							49	70	Primary	mRNA	Tumor	PTGIS	Expression	98	RRFS	univariable	Log-rank	worse			0.18
	27036135	102	Retrospective			12	19	20	51				60	Adjuvant	mRNA	Tumor	PTK2	Expression	102	DFS	univariable	ROC / AUC	pos. correlation			0.03
	29865035	60	Retrospective	47	13	8	10	34	4	2	58	38.7	66	Mixed	mRNA	Blood	RRM1	Expression	60	OS		HR	1.97	0.597	7	0.29
	29865035	60	Retrospective	47	13	8	10	34	4	2	58	38.7	66	Mixed	mRNA	Blood	RRM1	Expression	60	DFS		HR	1.65	0.49	6	0.45
	30993218	92	Mixed	76	16	24	30	8	30			100	72	Primary	mRNA	Tumor	SLC3A2	Expression	92	OS	multivariable	Concordance index	0.65	0.57	0.7	0.01
	29657990	152	Retrospective	127	25	46	15	8	83	5	147	36	56	Adjuvant	mRNA	Tumor	SLC3A2	Expression	152	LRC	multivariable	Concordance index	0.62	0.51	0.7	0.03
	31998639	197	Retrospective	55	142	85	78	34	0	2	195	100	70	Primary	mRNA	Tumor	SLC3A2	Expression	197	LRC	multivariable	HR	2.31	1.11	5	0.03
	27913065	158	Retrospective	133	25	80	51	0	27	0	158	100	68.4	Primary	mRNA	Tumor	SLC3A2	Expression	158	LRC	multivariable	HR	1.59	1.03	2	0.04
	31998639	197	Retrospective	55	142	85	78	34	0	2	195	100	70	Primary	mRNA	Tumor	SLC3A2	Expression	197	PFS	multivariable	HR	1.53	1.01	2	0.05
	31998639	197	Retrospective	55	142	85	78	34	0	2	195	100	70	Primary	mRNA	Tumor	SLC3A2	Expression	197	OS	multivariable	HR	1.46	0.96	2	0.08
	30993218	92	Mixed	76	16	24	30	8	30			100	72	Primary	mRNA	Tumor	SLC3A2	Expression	92	LRC	multivariable	Concordance index	0.58	0.49	0.7	0.09
	27913065	158	Retrospective	133	25	80	51	0	27	0	158	100	68.4	Primary	mRNA	Tumor	SLC3A2	Expression	158	FFDM	multivariable	HR	1.64	0.86	3	0.14
	31998639	197	Retrospective	55	142	85	78	34	0	2	195	100	70	Primary	mRNA	Tumor	SLC3A2	Expression	197	DRR	multivariable	HR	1.62	0.83	3	0.16
	27913065	158	Retrospective	133	25	80	51	0	27	0	158	100	68.4	Primary	mRNA	Tumor	SLC3A2	Expression	158	OS	multivariable	HR	1.25	0.85	2	0.26
	34999136	128	Retrospective	99	29	59	21	0	48	4	124	100	56	Adjuvant	mRNA	Tumor	SLC3A2	Expression	128	LRC	univariable	HR	1.29	0.6	3	0.52
	34999136	128	Retrospective	99	29	59	21	0	48	4	124	100	56	Adjuvant	mRNA	Tumor	SLC3A2	Expression	128	OS	univariable	HR	0.84	0.49	1	0.52
Multiple
	26025766	315	Retrospective	240	75	315	0	0	0	18	295		68	Primary	Other	Multiple	Multifactorial model (CD8+TILs, HLA class I + clinical parameters)	Risk score	315	Goodness of fit	multivariable	AUC	0.77	0.66	0.9
	28438294	258	Retrospective	201	57	258	0	0	0	15	243	42			Other	Multiple	Multifactorial model (CD8+TILs, HLA class I, HPV E2 mRNA, HPV E5 mRNA + clinical parameters)	Risk score	258	Goodness of fit	multivariable	AUC	0.76
Protein
	22333601	74	Retrospective	68	6	13	6	37	0			100	57.1	Mixed	Protein	Tumor	ALDH1	IHC level	74	LRFS	multivariable	HR	0.49			0.01
	22333601	74	Retrospective	68	6	13	6	37	0			100	57.1	Mixed	Protein	Tumor	ALDH1	IHC level	74	OS	univariable	HR	0.55			0.09
	22333601	74	Retrospective	68	6	13	6	37	0			100	57.1	Mixed	Protein	Tumor	ALDH1	IHC level	74	DMFS	univariable	HR	0.43			0.17
	23812668	89	Retrospective	75	14	55	0	0	0	4	85	79		Mixed	Protein	Tumor	ALDH3A1	IHC level	89	FFR	univariable	Log-rank				ns
	23812668	89	Retrospective	75	14	55	0	0	0	4	85	79		Mixed	Protein	Tumor	ALDH3A1	IHC level	89	OS	univariable	Log-rank				ns
	23812668	85	Retrospective	71	14	52	0	0	0	4	81	79		Mixed	Protein	Tumor	ALDH3A2	IHC level	85	FFR	univariable	Log-rank				ns
	23959264	163	Retrospective	124	39	69	22	39	33			47	60	Adjuvant	Protein	Tumor	AR	IHC level	163	OS	multivariable	HR	1.99	1.06	4	0.03
	23959264	163	Retrospective	124	39	69	22	39	33			47	60	Adjuvant	Protein	Tumor	AR	IHC level	163	DMFS	multivariable	HR	2.21	1.01	5	0.05
	23959264	163	Retrospective	124	39	69	22	39	33			47	60	Adjuvant	Protein	Tumor	AR	IHC level	163	LRC	univariable	Log-rank	ns			0.11
	20388242	60	Retrospective	43	17	60	0	0	0	15	45		54.7	Mixed	Protein	Tumor	CCND1	IHC level	60	DSS	univariable	HR	0.74	0.36	2	0.4
	20388242	60	Retrospective	43	17	60	0	0	0	15	45		54.7	Mixed	Protein	Tumor	CCND1	IHC level	60	LRC	univariable	HR	0.76	0.37	2	0.44
	24332450	86	Retrospective			31	0	55	0	38	48		68	Primary	Protein	Tumor	BCL2	IHC level	86	RFS	univariable	Log-rank	worse			0.01
	23599763	87	Retrospective	54	33	0	0	0	0	14	73	84		Primary	Protein	Tumor	BRCA1	IHC level	87	DMFS	univariable	Log-rank	better			0.06	Olaparib, Niraparib, Olaparib, Olaparib + Bevacizumab, Rucaparib, Talazoparib
	20388242	60	Retrospective	43	17	60	0	0	0	15	45		54.7	Mixed	Protein	Tumor	CA9	IHC level	60	LRC	multivariable	HR	5.82	2.24	15	<0.0001
	20388242	60	Retrospective	43	17	60	0	0	0	15	45		54.7	Mixed	Protein	Tumor	CA9	IHC level	60	DSS	multivariable	HR	10.66	4.18	27	<0.0001
	31811344	49	Prospective Cohort	44	5	19	12	7	2			100	70	Primary	Protein	Tumor	CA9	IHC level	49	LRC	univariable	Log-rank	worse			0.03
	25230150	114	Retrospective	86	28	0	25	89	0			71.9	58	Primary	Protein	Tumor	CA9	IHC level	114	DSS	multivaiable	HR	8.02	1.08	60	0.04
	25230150	114	Retrospective	86	28	0	25	89	0			71.9	58	Primary	Protein	Tumor	CA9	IHC level	114	DSS	univariable	Log-rank	worse			0.04
	33753155	39	Prospective Cohort	35	4	13	12	7	2			100	70	Primary	Protein	Tumor	CA9	IHC level	39	LRC	multivariable	HR	0.35	0.124	1	0.05
	25230150	114	Retrospective	86	28	0	25	89	0			71.9	58	Primary	Protein	Tumor	CA9	IHC level	114	LRC	univariable	Log-rank	worse			0.19
	29079308	100	Retrospective	80	20	64				0	100	100	70	Primary	Protein	Tumor	CA9	IHC level	100	LRC	univariable	HR	0.8			0.61
	30376862	85	Retrospective	64	21	16	15	19	27	25	59			Mixed	Protein	Tumor	CBR1	IHC level	85	OS	univariable	Log-rank	worse			0.02
	22333601	74	Retrospective	68	6	13	6	37	0			100	57.1	Mixed	Protein	Tumor	CD24	IHC level	74	LRFS	univariable	HR	1.33			0.52
	22333601	74	Retrospective	68	6	13	6	37	0			100	57.1	Mixed	Protein	Tumor	CD24	IHC level	74	OS	univariable	HR	1.18			0.7
	22333601	74	Retrospective	68	6	13	6	37	0			100	57.1	Mixed	Protein	Tumor	CD24	IHC level	74	DMFS	univariable	HR	0.76			0.87
	23108591	65	Retrospective			12	5	33	0			100	57.1	Primary	Protein	Tumor	PECAM1	CD31+ vascular density	65	LRFS	multivariable	HR	2.46			0
	23108591	65	Retrospective			12	5	33	0			100	57.1	Primary	Protein	Tumor	PECAM1	CD31+ vascular density	65	OS	multivariable	HR	2.15			0
	23108591	65	Retrospective			12	5	33	0			100	57.1	Primary	Protein	Tumor	PECAM1	CD31+ vascular density	65	DMFS	multivariable	HR	4.32			0.01
	31811344	49	Prospective Cohort	44	5	19	12	7	2			100	70	Primary	Protein	Tumor	CD34	IHC level	49	LRC	univariable	Log-rank				0.96
	29079308	100	Retrospective	80	20	64				0	100	100	70	Primary	Protein	Tumor	CD34	IHC level	100	LRC	univariable	HR	2.3			0.02
	27913065	158	Retrospective	133	25	80	51	0	27	0	158	100	68.4	Primary	Protein	Tumor	CD44	IHC level	158	OS	multivariable	HR	2.7	1.28	6	0.01
	27913065	158	Retrospective	133	25	80	51	0	27	0	158	100	68.4	Primary	Protein	Tumor	CD44	IHC level	158	LRC	multivariable	HR	2.42	1.02	6	0.05
	27913065	158	Retrospective	133	25	80	51	0	27	0	158	100	68.4	Primary	Protein	Tumor	CD44	IHC level	158	FFDM	multivariable	HR	4	0.93	17	0.06
	22333601	74	Retrospective	68	6	13	6	37	0			100	57.1	Mixed	Protein	Tumor	CD44	IHC level	74	LRFS	multivariable	HR	1.91			0.22
	22333601	74	Retrospective	68	6	13	6	37	0			100	57.1	Mixed	Protein	Tumor	CD44	IHC level	74	OS	univariable	HR	1.51			0.24
	22333601	74	Retrospective	68	6	13	6	37	0			100	57.1	Mixed	Protein	Tumor	CD44	IHC level	74	DMFS	univariable	HR	0.57			0.36
	33066224	259	Retrospective	192	67	259	0	0	0	45	212	36.3		Mixed	Protein	Tumor	TNS4	IHC level	259	OS	univariable	Log-rank	worse			<0.0001
	26374452	233	Self-proclaimed prospective	197	36	99	44	27	63	7	226	73.4	66	Primary	Protein	Tumor	CXCL12	IHC level	233	OS	multivariable	HR	1	0.996	1	0.39
	26374452	233	Self-proclaimed prospective	197	36	99	44	27	63	7	226	73.4	66	Primary	Protein	Tumor	CXCR4	IHC level	233	DMFS	multivariable	HR	1.01	1	1	0.04
	26374452	233	Self-proclaimed prospective	197	36	99	44	27	63	7	226	73.4	66	Primary	Protein	Tumor	CXCR4	IHC level	233	DFS	univariable	HR	1.8			0.06
	29061496	141	Retrospective	119	22	72	46	0	23	0	141	100	70	Primary	Protein	Tumor	CXCR4	IHC level	141	LRC	multivariable	HR	3.81	0.92	16	0.07
	29594214	201	Retrospective	161	40	116	29	0	56	0	201	100	56	Adjuvant	Protein	Tumor	CXCR4	IHC level, membranous	201	LRC	univariable	HR	2.13	0.74	6	0.16
	29594214	201	Retrospective	161	40	116	29	0	56	0	201	100	56	Adjuvant	Protein	Tumor	CXCR4	IHC level, membranous	201	OS	univariable	HR	1.72	0.78	4	0.18
	29594214	201	Retrospective	161	40	116	29	0	56	0	201	100	56	Adjuvant	Protein	Tumor	CXCR4	IHC level, intracellular	201	OS	univariable	HR	1.26	0.75	2	0.38
	29594214	201	Retrospective	161	40	116	29	0	56	0	201	100	56	Adjuvant	Protein	Tumor	CXCR4	IHC level, intracellular	201	LRC	multivariable	HR	1.13	0.52	2	0.76
	29594214	201	Retrospective	161	40	116	29	0	56	0	201	100	56	Adjuvant	Protein	Tumor	CXCR4	IHC level, intracellular	201	DMFS	univariable	HR	1.07	0.53	2	0.86
	29594214	201	Retrospective	161	40	116	29	0	56	0	201	100	56	Adjuvant	Protein	Tumor	CXCR4	IHC level, membranous	201	DMFS	univariable	HR	1.1	0.34	4	0.87
	19733016	148	Prospective randomized trial	133	15	0	0	73	0				62	Adjuvant	Protein	Tumor	CCND1	IHC level	148	LRC	univariable	HR	1.03	0.71	2	0.51
	22241958	72	Retrospective											Primary	Protein	Tumor	PPIB	IHC level	72	OS	univariable	Log-rank	worse			0.04
	28351564	127	Retrospective			58	20	14	35	20	107	15	40	Adjuvant	Protein	Tumor	DCLK1	IHC level	127	OS	multivariable	HR	2.1	1.2	4	0.01
	28351564	127	Retrospective			58	20	14	35	20	107	15	40	Adjuvant	Protein	Tumor	DCLK1	IHC level	127	DFS	multivariable	HR	2.1	1.3	4	0.01
	25301099	40	Retrospective	32	8	16	11	5	8			67.5		Primary	Protein	Tumor	DSC3	IHC level	40	DFS	multivariable	HR	0.61	0.18	2	0.44
	25301099	40	Retrospective	32	8	16	11	5	8			67.5		Primary	Protein	Tumor	DSC3	IHC level	40	OS	multivariable	HR	0.84	0.37	2	0.68
	23108591	65	Retrospective			12	5	33	0			100	57.1	Primary	Protein	Tumor	DLL4	IHC level	65	LRFS	multivariable	HR	1.79			0.15
	23108591	65	Retrospective			12	5	33	0			100	57.1	Primary	Protein	Tumor	DLL4	IHC level	65	OS	univariable	HR	1.61			0.23
	23108591	65	Retrospective			12	5	33	0			100	57.1	Primary	Protein	Tumor	DLL4	IHC level	65	DMFS	univariable	HR	1.2			0.78
	23599763	87	Retrospective	54	33	0	0	0	0	14	73	84		Primary	Protein	Tumor	PRKDC	IHC level	87	DMFS	multivariable	HR	0.2	0.082	0.5	0
	21284050	95	Prospective non-randomized			95	0	0	0	15	80			Mixed	Protein	Tumor	DNMT1	IHC level	95	DFS	multivariable	HR	2.55	1.3236	5	0.01
	21284050	95	Retrospective			95	0	0	0	15	80			Mixed	Protein	Tumor	DNMT1	IHC level	95	OS	multivariable	HR	2.33	1.0358	5	0.04
	31822892	51	Retrospective	36	15	0	0	0	0	18	33	82.4	70	Primary	Protein	Tumor	EBV	virus presence	51	LRC	univariable	Log-rank	worse			0.02
	31822892	51	Retrospective	36	15	0	0	0	0	18	33	82.4	70	Primary	Protein	Tumor	EBV	virus presence	51	OS	univariable	Log-rank	worse			0.03
	31822892	51	Retrospective	36	15	0	0	0	0	18	33	82.4	70	Primary	Protein	Tumor	EBV	virus presence	51	PFS	univariable	Log-rank				0.25
	19733016	148	Prospective randomized trial	133	15	0	0	73	0				62	Adjuvant	Protein	Tumor	EGFR	IHC level	148	LRC	multivariable	HR	1.35	1	2	0	Afatinib, Dacomitinib, Erlotinib, Erlotinib + Ramucirumab, Gefitinib, Osimertinib, Amivantamab, Mobocertinib, Erlotinib, Patritumab Deruxtecan, CLN-081, Poziotinib
	24060179	336	Prospective randomized trial	247	89	336	0	0	0	65	271	83	66	Primary	Protein	Tumor	EGFR	IHC level	336	LC	univariable	HR	0.53	0.29	0.9	0.03	Afatinib, Dacomitinib, Erlotinib, Erlotinib + Ramucirumab, Gefitinib, Osimertinib, Amivantamab, Mobocertinib, Erlotinib, Patritumab Deruxtecan, CLN-081, Poziotinib
	20388242	60	Retrospective	43	17	60	0	0	0	15	45		54.7	Mixed	Protein	Tumor	EGFR	IHC level	60	DSS	univariable	HR	1.8	0.91	4	0.08	Afatinib, Dacomitinib, Erlotinib, Erlotinib + Ramucirumab, Gefitinib, Osimertinib, Amivantamab, Mobocertinib, Erlotinib, Patritumab Deruxtecan, CLN-081, Poziotinib
	32296588	115	Retrospective	8	30	23	1	2	5	3	35	100			Protein	Tumor	EGFR	IHC level	115	PFS	multivariable	HR	2.55	0.85	8	0.08	Afatinib, Dacomitinib, Erlotinib, Erlotinib + Ramucirumab, Gefitinib, Osimertinib, Amivantamab, Mobocertinib, Erlotinib, Patritumab Deruxtecan, CLN-081, Poziotinib
	20388242	60	Retrospective	43	17	60	0	0	0	15	45		54.7	Mixed	Protein	Tumor	EGFR	IHC level	60	LRC	univariable	HR	1.52	0.76	3	0.23	Afatinib, Dacomitinib, Erlotinib, Erlotinib + Ramucirumab, Gefitinib, Osimertinib, Amivantamab, Mobocertinib, Erlotinib, Patritumab Deruxtecan, CLN-081, Poziotinib
	24060179	336	Prospective randomized trial	247	89	336	0	0	0	65	271	83	66	Primary	Protein	Tumor	EGFR	IHC level	336	LRC	univariable	HR	0.8	0.53	1	0.3	Afatinib, Dacomitinib, Erlotinib, Erlotinib + Ramucirumab, Gefitinib, Osimertinib, Amivantamab, Mobocertinib, Erlotinib, Patritumab Deruxtecan, CLN-081, Poziotinib
	20502457	140	Retrospective	94	46	25	8	28	79	22	118			Adjuvant	Protein	Tumor	EGFR	IHC level	140	LRR	univariable	HR	0.5	0.1	2	0.32	Afatinib, Dacomitinib, Erlotinib, Erlotinib + Ramucirumab, Gefitinib, Osimertinib, Amivantamab, Mobocertinib, Erlotinib, Patritumab Deruxtecan, CLN-081, Poziotinib
	24060179	336	Prospective randomized trial	247	89	336	0	0	0	65	271	83	66	Primary	Protein	Tumor	EGFR	IHC level	336	LRF	multivariable	HR	0.97	0.62	2	ns	Afatinib, Dacomitinib, Erlotinib, Erlotinib + Ramucirumab, Gefitinib, Osimertinib, Amivantamab, Mobocertinib, Erlotinib, Patritumab Deruxtecan, CLN-081, Poziotinib
	24060179	336	Prospective randomized trial	247	89	336	0	0	0	65	271	83	66	Primary	Protein	Tumor	EGFR	IHC level	336	LF	multivariable	HR	0.66	0.37	1	ns	Afatinib, Dacomitinib, Erlotinib, Erlotinib + Ramucirumab, Gefitinib, Osimertinib, Amivantamab, Mobocertinib, Erlotinib, Patritumab Deruxtecan, CLN-081, Poziotinib
	24060179	336	Prospective randomized trial	247	89	336	0	0	0	65	271	83	66	Primary	Protein	Tumor	EGFR	IHC level	336	DSS	multivariable	HR	0.95	0.62	1	ns	Afatinib, Dacomitinib, Erlotinib, Erlotinib + Ramucirumab, Gefitinib, Osimertinib, Amivantamab, Mobocertinib, Erlotinib, Patritumab Deruxtecan, CLN-081, Poziotinib
	24060179	336	Prospective randomized trial	247	89	336	0	0	0	65	271	83	66	Primary	Protein	Tumor	EGFR	IHC level	336	OS	multivariable	HR	0.95	0.67	1	ns	Afatinib, Dacomitinib, Erlotinib, Erlotinib + Ramucirumab, Gefitinib, Osimertinib, Amivantamab, Mobocertinib, Erlotinib, Patritumab Deruxtecan, CLN-081, Poziotinib
	27549330	123	Retrospective	103	20	0	0	0	0	2	121	100	66	Primary	Protein	Tumor	EIF5A2	IHC level	123	FFS	multivariable	HR	3.13	1.122	9	0.03
	27549330	123	Retrospective	103	20	0	0	0	0	2	121	100	66	Primary	Protein	Tumor	EIF5A2	IHC level	123	OS	multivariable	HR	2.95	1.046	8	0.04
	27549330	123	Retrospective	103	20	0	0	0	0	2	121	100	66	Primary	Protein	Tumor	EIF5A2	IHC level	123	DFFS	multivariable	HR	3.38	1.04	11	0.04
	28039609	125	Retrospective			56	16	14	34	0	125	6.4		Adjuvant	Protein	Tumor	ELMO3	IHC level	125	OS	multivariable	HR	3.43	1.53	3	0
	28039609	125	Retrospective			56	16	14	34	0	125	6.4		Adjuvant	Protein	Tumor	ELMO3	IHC level	125	DFS	multivariable	HR	3.09	1.83	6	0
	31822892	51	Retrospective	36	15	0	0	0	0	18	33	82.4	70	Primary	Protein	Tumor	EpCAM	IHC level	51	PFS	univariable	Log-rank				0.48
	31822892	51	Retrospective	36	15	0	0	0	0	18	33	82.4	70	Primary	Protein	Tumor	EpCAM	IHC level	51	OS	univariable	Log-rank				0.49
	31822892	51	Retrospective	36	15	0	0	0	0	18	33	82.4	70	Primary	Protein	Tumor	EpCAM	IHC level	51	LRC	univariable	Log-rank				0.68
	23700207	144	Retrospective	83	86	59	23	35	27			44	60	Adjuvant	Protein	Tumor	EPOR	IHC level	144	OS	multivariable	HR	2.36	1.22	4,92	0.01
	23700207	144	Retrospective	83	86	59	23	35	27			44	60	Adjuvant	Protein	Tumor	EPOR	IHC level	144	DMFS	univariable	Log-rank	better			0.26
	23700207	144	Retrospective	83	86	59	23	35	27			44	60	Adjuvant	Protein	Tumor	EPOR	IHC level	144	LRC	univariable	HR	better			0.28
	23700207	144	Retrospective	83	86	59	23	35	27			44	60	Adjuvant	Protein	Tumor	EPO	IHC level	144	OS	multivariable	HR	4.77	1.63	21	0
	23700207	144	Retrospective	83	86	59	23	35	27			44	60	Adjuvant	Protein	Tumor	EPO	IHC level	144	DMFS	multivariable	HR	5.45	1.13	98	0.01
	23700207	144	Retrospective	83	86	59	23	35	27			44	60	Adjuvant	Protein	Tumor	EPO	IHC level	144	LRC	multivariable	HR	3.72	1.35	15	0.01
	24064970	90	Prospective randomized trial	79	11	64	5	18	1		90	100	70	Primary	Protein	Tumor	ERCC1	IHC level	90	PFS	multivariable	HR	3	1.2	8	0.02
	24088734	223	Retrospective	142	81	4	7	28	172			11		Adjuvant	Protein	Tumor	ERCC1	IHC level	223	OS	multivariable	HR	2.35			0.04
	22199271	73	Retrospective	72	1	41	10	17	3			100		Primary	Protein	Tumor	ERCC1	IHC level	73	OS	multivariable	HR	0.62	0.28	1	0.25
	23763459	177	Retrospective	114	63	30	8	39	100	30	147	0		Adjuvant	Protein	Tumor	FADD	IHC level	177	DMFS	univariable	Log-rank	worse			0.01
	23763459	177	Retrospective	114	63	30	8	39	100	30	147	0		Adjuvant	Protein	Tumor	FADD	IHC level	177	DMFS	multivariable	HR	2.3	0.96	6	0.06
	23861152	146	Retrospective	111	35	61	29	35	29		146	46	70	Adjuvant	Protein	Tumor	FGF2	IHC level	146	LRC	multivariable	HR	7.33	2.88	19	<0.001
	23861152	146	Retrospective	111	35	61	29	35	29		146	46	70	Adjuvant	Protein	Tumor	FGF2	IHC level	146	DMFS	multivariable	HR	2.07	0.73	5	0.16
	20388242	60	Retrospective	43	17	60	0	0	0	15	45		54.7	Mixed	Protein	Tumor	FHIT	IHC level	60	DSS	univariable	HR	0.83	0.41	2	0.58
	20388242	60	Retrospective	43	17	60	0	0	0	15	45		54.7	Mixed	Protein	Tumor	FHIT	IHC level	60	LRC	univariable	HR	0.83	0.42	2	0.6
	23748230	157	Retrospective	120	37	64	23	38	32		157	43	60	Adjuvant	Protein	Tumor	FLT1	IHC level	157	LRC	multivariable	HR	2.2	1.08	4	0.03
	23748230	157	Retrospective	120	37	64	23	38	32		157	43	60	Adjuvant	Protein	Tumor	FLT1	IHC level	157	DMFS	univariable	Log-rank	worse			0.11
	23748230	157	Retrospective	120	37	64	23	38	32		157	43	60	Adjuvant	Protein	Tumor	FLT1	IHC level	157	OS	multivariable	HR	1.53	0.75	3	0.24
	28032719	61	Retrospective	55	6	0	0	61	0	26	35	100	70.7	Primary	Protein	Tumor	GMNN	IHC level	61	PFS	multivariable	HR	7.36	2.5	22	0.04
	28032719	61	Retrospective	55	6	0	0	61	0	26	35	100	70.7	Primary	Protein	Tumor	GMNN	IHC level	61	OS	multivariable	HR	4.44	0.1	225	0.4
	27918595	36	Self-proclaimed prospective	7	29	13	11	6	6	0	36	16.7	52	Adjuvant	Protein	Tumor	GLI1	IHC level	36	DFS	univariable	Log-rank	equal			0.18
	27918595	36	Self-proclaimed prospective	7	29	13	11	6	6	0	36	16.7	52	Adjuvant	Protein	Tumor	GLI1	IHC level	36	OS	multivariable	HR	0.64	0.2	2	0.45
	27918595	36	Self-proclaimed prospective	7	29	13	11	6	6	0	36	16.7	52	Adjuvant	Protein	Tumor	GLI1	IHC level	36	LRC	univariable	Log-rank	equal			0.72
	27918595	36	Self-proclaimed prospective	7	29	13	11	6	6	0	36	16.7	52	Adjuvant	Protein	Tumor	GLI2	IHC level	36	OS	multivariable	HR	0.4	0.16	0.9	0.03
	27918595	36	Self-proclaimed prospective	7	29	13	11	6	6	0	36	16.7	52	Adjuvant	Protein	Tumor	GLI2	IHC level	36	DFS	univariable	Log-rank	better			0.04
	27918595	36	Self-proclaimed prospective	7	29	13	11	6	6	0	36	16.7	52	Adjuvant	Protein	Tumor	GLI2	IHC level	36	LRC	univariable	Log-rank	equal			0.95
	27918595	36	Self-proclaimed prospective	7	29	13	11	6	6	0	36	16.7	52	Adjuvant	Protein	Tumor	GLI3	IHC level	36	LRC	univariable	Log-rank	equal			0.3
	27918595	36	Self-proclaimed prospective	7	29	13	11	6	6	0	36	16.7	52	Adjuvant	Protein	Tumor	GLI3	IHC level	36	OS	univariable	Log-rank	equal			0.38
	27918595	36	Self-proclaimed prospective	7	29	13	11	6	6	0	36	16.7	52	Adjuvant	Protein	Tumor	GLI3	IHC level	36	DFS	univariable	Log-rank	equal			0.7
	20388242	60	Retrospective	43	17	60	0	0	0	15	45		54.7	Mixed	Protein	Tumor	SLC2A1	IHC level	60	LRC	univariable	HR	0.64	0.33	1	0.2
	20388242	60	Retrospective	43	17	60	0	0	0	15	45		54.7	Mixed	Protein	Tumor	SLC2A1	IHC level	60	DSS	univariable	HR	0.69	0.36	1	0.25
	28536671	87	Retrospective	73	14	63	0	0	0	3	84	63	72	Primary	Protein	Tumor	GPX1	IHC level	87	LC	univariable	Log-rank	no correlation			0.62
	28536671	87	Retrospective	73	14	63	0	0	0	3	84	63	72	Primary	Protein	Tumor	GPX1	IHC level	87	OS	univariable	Log-rank	no correlation			0.85
	28536671	87	Retrospective	73	14	63	0	0	0	3	84	63	72	Primary	Protein	Tumor	GPX1	IHC level	87	DFS	univariable	Log-rank	no correlation			0.92
	28536671	87	Retrospective	73	14	63	0	0	0	3	84	63	72	Primary	Protein	Tumor	GPX1	IHC level	87	LRC	univariable	Log-rank	no correlation			0.99
	28032719	61	Retrospective	55	6	0	0	61	0	26	35	100	70.7	Primary	Protein	Tumor	EGFR	IHC level	61	PFS	multivariable	HR	1.78	0.6	6	0.31	Afatinib, Dacomitinib, Erlotinib, Erlotinib + Ramucirumab, Gefitinib, Osimertinib, Amivantamab, Mobocertinib, Erlotinib, Patritumab Deruxtecan, CLN-081, Poziotinib
	28032719	61	Retrospective	55	6	0	0	61	0	26	35	100	70.7	Primary	Protein	Tumor	EGFR	IHC level	61	OS	multivariable	HR	1.34	0.05	72	0.86	Afatinib, Dacomitinib, Erlotinib, Erlotinib + Ramucirumab, Gefitinib, Osimertinib, Amivantamab, Mobocertinib, Erlotinib, Patritumab Deruxtecan, CLN-081, Poziotinib
	20502457	140	Retrospective	94	46	25	8	28	79	22	118			Adjuvant	Protein	Tumor	ERBB2	IHC level	140	LRR	univariable	HR	1	0.2	4	0.99	Ado-Trastuzumab Emtansine, Lapatinib + Capecitabine, Lapatinib + Letrozole, Margetuximab + Chemotherapy, Neratinib, Neratinib + Capecitabine, Trastuzumab + Pertuzumab + Chemotherapy, Trastuzumab + Tucatinib + Capecitabine, Trastuzumab Deruxtecan, Trastuzumab, Trastuzumab + Chemotherapy, Pembrolizumab + Trastuzumab + Chemotherapy, Trastuzumab + Chemotherapy, Lapatinib + Trastuzumab, Trastuzumab + …
	23028863	66	Retrospective	56	10				66	16	50			Adjuvant	Protein	Tumor	HIF1A	IHC level	66	LRFS		HR	10.2	1.19	88	0.01
	23028863	66	Retrospective	56	10				66	16	50			Adjuvant	Protein	Tumor	HIF1A	IHC level	66	DSS		HR	3.41	1.13	10	0.02
	25230150	114	Retrospective	86	28	0	25	89	0			71.9	58	Primary	Protein	Tumor	HIF1A	IHC level	114	DSS	univariable	Log-rank	worse			0.09
	25230150	114	Retrospective	86	28	0	25	89	0			71.9	58	Primary	Protein	Tumor	HIF1A	IHC level	114	LRC	univariable	Log-rank	worse			0.67
	20388242	60	Retrospective	43	17	60	0	0	0	15	45		54.7	Mixed	Protein	Tumor	HIF1A	IHC level	60	LRC	univariable	HR	4.96	2.4	10	<0.0001
	20388242	60	Retrospective	43	17	60	0	0	0	15	45		54.7	Mixed	Protein	Tumor	HIF1A	IHC level	60	DSS	univariable	HR	4.85	2.44	10	<0.0001
	31811344	49	Prospective Cohort	44	5	19	12	7	2			100	70	Primary	Protein	Tumor	HIF1A	IHC level	49	LRC	univariable	Log-rank				0.99
	30172455	95	Retrospective	76	19	63				0	95	100	70	Primary	Protein	Tumor	HLA-A	IHC level	95	OS	multivariable	HR	0.6	0.3	1	0.17
	30172455	95	Retrospective	76	19	63				0	95	100	70	Primary	Protein	Tumor	HLA-A	IHC level	95	PFS	multivariable	HR	0.8	0.4	2	0.46
	29235112	145	Retrospective	122	23	87	20	0	38	0	145	100	66	Adjuvant	Protein	Tumor	HSPA1A	IHC level	145	OS	multivariable	HR	3.62	1.89	7	0
	29235112	145	Retrospective	122	23	87	20	0	38	0	145	100	66	Adjuvant	Protein	Tumor	HSPA1A	IHC level	145	LPFS	multivariable	HR	2.63	1.45	5	0
	29235112	145	Retrospective	122	23	87	20	0	38	0	145	100	66	Adjuvant	Protein	Tumor	HSPA1A	IHC level	145	DMFS	multivariable	HR	2.42	1.34	4	0
	27918595	36	Self-proclaimed prospective	7	29	13	11	6	6	0	36	16.7	52	Adjuvant	Protein	Tumor	IHH	IHC level	36	OS	univariable	Log-rank	equal			0.25
	27918595	36	Self-proclaimed prospective	7	29	13	11	6	6	0	36	16.7	52	Adjuvant	Protein	Tumor	IHH	IHC level	36	LRC	univariable	Log-rank	equal			0.39
	27918595	36	Self-proclaimed prospective	7	29	13	11	6	6	0	36	16.7	52	Adjuvant	Protein	Tumor	IHH	IHC level	36	DFS	univariable	Log-rank	equal			0.44
	34773163	27	Prospective Cohort	24	3	16	4	1	2	0	27	100	69.9	Primary	Protein	Blood	IL6	Plasma level, 5 weeks (continuous variable)	27	OS		HR	1.02	1.004	1	0.01
	21284050	95	Prospective non-randomized			95	0	0	0	15	80			Mixed	Protein	Tumor	IL6	IHC level	95	DFS	multivariable	HR	2	1.0587	4	0.03
	34773163	27	Prospective Cohort	24	3	16	4	1	2	0	27	100	69.9	Primary	Protein	Blood	IL6	Plasma level, 5 weeks	27	OS		Log-rank	worse			0.06
	34773163	27	Prospective Cohort	24	3	16	4	1	2	0	27	100	69.9	Primary	Protein	Blood	IL6	Plasma level, 5 weeks (continuous variable)	27	PFS		HR	1.03	0.996	1	0.08
	34773163	27	Prospective Cohort	24	3	16	4	1	2	0	27	100	69.9	Primary	Protein	Blood	IL6	Plasma level, 5 weeks (continuous variable)	27	PFS		HR	1.01	0.999	1	0.08
	34773163	27	Prospective Cohort	24	3	16	4	1	2	0	27	100	69.9	Primary	Protein	Blood	IL6	Plasma level, 5 weeks (continuous variable)	27	OS		HR	1.03	0.996	1	0.09
	34773163	27	Prospective Cohort	24	3	16	4	1	2	0	27	100	69.9	Primary	Protein	Blood	IL6	Plasma level, 5 weeks (continuous variable)	27	OS		HR	1.04	0.994	1	0.09
	21284050	95	Retrospective			95	0	0	0	15	80			Mixed	Protein	Tumor	IL6	IHC level	95	OS	multivariable	HR	1.84	0.8518	4	0.12
	34773163	27	Prospective Cohort	24	3	16	4	1	2	0	27	100	69.9	Primary	Protein	Blood	IL6	Plasma level, 5 weeks (continuous variable)	27	LRC		HR	1.02	0.994	1	0.12
	34773163	27	Prospective Cohort	24	3	16	4	1	2	0	27	100	69.9	Primary	Protein	Blood	IL6	Plasma level, 5 weeks (continuous variable)	27	LRC		HR	1.01	0.993	1	0.32
	34773163	27	Prospective Cohort	24	3	16	4	1	2	0	27	100	69.9	Primary	Protein	Blood	IL6	Plasma level, 5 weeks (continuous variable)	27	LRC		HR	0.98	0.926	1	0.44
	34773163	27	Prospective Cohort	24	3	16	4	1	2	0	27	100	69.9	Primary	Protein	Blood	IL6	Plasma level, 5 weeks (continuous variable)	27	PFS		HR	1.01	0.971	1	0.66
	22333601	74	Retrospective	68	6	13	6	37	0			100	57.1	Mixed	Protein	Tumor	ITGB1	IHC level	74	LRFS	multivariable	HR	3.08			0.01
	22333601	74	Retrospective	68	6	13	6	37	0			100	57.1	Mixed	Protein	Tumor	ITGB1	IHC level	74	DMFS	multivariable	HR	5.72			0.01
	22333601	74	Retrospective	68	6	13	6	37	0			100	57.1	Mixed	Protein	Tumor	ITGB1	IHC level	74	OS	univariable	HR	2.56			0.01
	19733016	148	Prospective randomized trial	133	15	0	0	73	0				62	Adjuvant	Protein	Tumor	MKI67	IHC level	148	LRC	univariable	HR	0.79	0.51	1	0.14
	20388242	60	Retrospective	43	17	60	0	0	0	15	45		54.7	Mixed	Protein	Tumor	MKI67	IHC level	60	DSS	univariable	HR	2.03	1.07	4	0.03
	26265441	69	Retrospective	45	24	5	2	14	44	4	65			Adjuvant	Protein	Tumor	MKI67	IHC level	69	OS	multivariable	HR	0.52	0.2807	1	0.04
	20388242	60	Retrospective	43	17	60	0	0	0	15	45		54.7	Mixed	Protein	Tumor	MKI67	IHC level	60	LRC	univariable	HR	1.84	0.97	4	0.06
	30756227	13	Retrospective	11	2	0	0	0	0			100	50	Adjuvant	Protein	Tumor	MKI67	IHC level	13	OS	univariable	Log-rank	no difference			0.39
	30756227	13	Retrospective	11	2	0	0	0	0			100	50	Adjuvant	Protein	Tumor	MKI67	IHC level	13	DFS	univariable	Log-rank	no difference			0.67
	26884852	225	Retrospective	192	34					32	194			Mixed	Protein	Tumor	KPNA2	IHC level nuclear/cytoplasmic (any)	225	DMFS	multivariable	HR	2.82	1.303	6	0.01
	26884852	225	Retrospective	192	34					32	194			Mixed	Protein	Tumor	KPNA2	IHC level nuclear/cytoplasmic (any)	225	DFS	multivariable	HR	0.58	0.342	1	0.04
	26884852	225	Retrospective	192	34					32	194			Mixed	Protein	Tumor	KPNA2	IHC level, nuclear	225	DMFS	multivariable	HR	1.83	0.844	4	0.13
	26884852	225	Retrospective	192	34					32	194			Mixed	Protein	Tumor	KPNA2	IHC level, nuclear	225	DFS	univariable	HR	0.89	0.452	2	0.73
	26884852	225	Retrospective	192	34					32	194			Mixed	Protein	Tumor	KPNA2	IHC level, nuclear	225	DMFS	univariable	HR	1.25	0.363	4	0.73
	26884852	225	Retrospective	192	34					32	194			Mixed	Protein	Tumor	KPNA2	IHC level, nuclear	225	DFS	univariable	HR	0.9	0.413	2	0.8
	21349997	89	Retrospective	73	16	61	7	21	0	15	74	40	60	Mixed	Protein	Tumor	XRCC5	IHC level	89	LRC		Log-rank	worse			<0.005
	21349997	89	Retrospective	73	16	61	7	21	0	15	74	40	60	Mixed	Protein	Tumor	XRCC5	IHC level	89	OS		Log-rank	worse			<0.005
	31811344	49	Prospective Cohort	44	5	19	12	7	2			100	70	Primary	Protein	Tumor	XRCC5	IHC level	49	LRC	univariable	Log-rank				0.31
	31579068	127	Retrospective	102	25	0	0	0	127	39	88		60	Adjuvant	Protein	Tumor	MCM7	IHC level	127	DFS	multivariable	HR	2.7	1.608	5	0
	31579068	127	Retrospective	102	25	0	0	0	127	39	88		60	Adjuvant	Protein	Tumor	MCM7	IHC level	127	DSS	multivariable	HR	2.44	1.478	4	0
	31579068	127	Retrospective	102	25	0	0	0	127	39	88		60	Adjuvant	Protein	Tumor	MCM7	IHC level	127	LRFS	multivariable	HR	3.09	1.729	6	0
	31579068	127	Retrospective	102	25	0	0	0	127	39	88		60	Adjuvant	Protein	Tumor	MCM7	IHC level	127	OS	multivariable	HR	1.62	1.136	2	0.01
	28032719	61	Retrospective	55	6	0	0	61	0	26	35	100	70.7	Primary	Protein	Tumor	MCM7	IHC level	61	PFS	multivariable	HR	3.9	1.2	16	0.03
	28032719	61	Retrospective	55	6	0	0	61	0	26	35	100	70.7	Primary	Protein	Tumor	MCM7	IHC level	61	OS	multivariable	HR	6.17	0.9	68	0.04
	33633176	82	Retrospective	67	15	37	14	7	24	3	79	78	67.1	Primary	Protein	Tumor	SLC16A1	IHC level	82	PFS	multivariable	HR	3.07	1.44	7	0
	33633176	82	Retrospective	67	15	37	14	7	24	3	79	78	67.1	Primary	Protein	Tumor	SLC16A1	IHC level	82	OS	multivariable	HR	3.79	1.68	9	0
	33633176	82	Retrospective	67	15	37	14	7	24	3	79	78	67.1	Primary	Protein	Tumor	SLC16A3	IHC level	82	OS	multivariable	HR	1.7	0.89	3	0.11
	33633176	82	Retrospective	67	15	37	14	7	24	3	79	78	67.1	Primary	Protein	Tumor	SLC16A3	IHC level	82	PFS	multivariable	HR	1.48	0.85	3	0.17
	22333601	74	Retrospective	68	6	13	6	37	0			100	57.1	Mixed	Protein	Tumor	MIB1	IHC level	74	LRFS	univariable	HR	1.29			0.5
	22333601	74	Retrospective	68	6	13	6	37	0			100	57.1	Mixed	Protein	Tumor	MIB1	IHC level	74	DMFS	univariable	HR	1.5			0.5
	22333601	74	Retrospective	68	6	13	6	37	0			100	57.1	Mixed	Protein	Tumor	MIB1	IHC level	74	OS	univariable	HR	0.9			0.77
	20388242	60	Retrospective	43	17	60	0	0	0	15	45		54.7	Mixed	Protein	Tumor	MVP	IHC level	60	DSS	univariable	HR	3.56	1.88	7	0
	20388242	60	Retrospective	43	17	60	0	0	0	15	45		54.7	Mixed	Protein	Tumor	MVP	IHC level	60	LRC	multivariable	HR	2.61	1.18	6	0.02
	19733016	148	Prospective randomized trial	133	15	0	0	73	0				62	Adjuvant	Protein	Tumor	NME1	IHC level	148	LRC	multivariable	HR	1.65	1.05	3	0.01
	21509763	105	Retrospective			0	0	0	0				70	Adjuvant	Protein	Tumor	NME1	IHC level	105	RFS	multivariable	HR	1.39			0.16
	21509763	105	Retrospective			0	0	0	0				70	Adjuvant	Protein	Tumor	NME1	IHC level	105	OS	multivariable	HR	0.54			0.23
	21509763	105	Retrospective			0	0	0	0				70	Adjuvant	Protein	Tumor	NME1	IHC level	105	OS	multivariable	HR	7.48			<0.0001
	21509763	105	Retrospective			0	0	0	0				70	Adjuvant	Protein	Tumor	NME1	IHC level	105	RFS	multivariable	HR	2.38			0.01
	22333601	74	Retrospective	68	6	13	6	37	0			100	57.1	Mixed	Protein	Tumor	POU5F1	IHC level	74	OS	univariable	HR	1.88			0.08
	22333601	74	Retrospective	68	6	13	6	37	0			100	57.1	Mixed	Protein	Tumor	POU5F1	IHC level	74	DMFS	multivariable	HR	2.38			0.17
	22333601	74	Retrospective	68	6	13	6	37	0			100	57.1	Mixed	Protein	Tumor	POU5F1	IHC level	74	LRFS	multivariable	HR	1.05			0.89
	21284050	95	Retrospective			95	0	0	0	15	80			Mixed	Protein	Tumor	AKT1	IHC level	95	OS	multivariable	HR	1.92	0.5657	7	0.23	AZD5363
	21284050	95	Prospective non-randomized			95	0	0	0	15	80			Mixed	Protein	Tumor	AKT1	IHC level	95	DFS	multivariable	HR	1.16	0.5092	3	0.72	AZD5363
	25388642	120	Retrospective							0	120			Mixed	Protein	Tumor	AKT1	Phosphorylation level	120	PFS	multivariable	HR	9.69	2.104	45	0	AZD5363
	25388642	120	Retrospective							0	120			Mixed	Protein	Tumor	AKT1	Phosphorylation level	120	OS	multivariable	HR	7.17	1.595	32	0.01	AZD5363
	25388642	120	Retrospective							0	120			Mixed	Protein	Tumor	AKT1	Phosphorylation level	120	PFS	univariable	Log-rank	worse			0.02	AZD5363
	25388642	120	Retrospective							0	120			Mixed	Protein	Tumor	AKT1	Phosphorylation level	120	OS	univariable	Log-rank	worse			0.03	AZD5363
	25388642	120	Retrospective							0	120			Mixed	Protein	Tumor	AKT1	Phosphorylation level	120	OS	multivariable	HR	0.73	0.356	2	0.4	AZD5363
	25388642	120	Retrospective							0	120			Mixed	Protein	Tumor	AKT1	Phosphorylation level	120	PFS	multivariable	HR	0.81	0.4	2	0.55	AZD5363
	25388642	120	Retrospective							0	120			Mixed	Protein	Tumor	AKT1	Phosphorylation level	120	OS	univariable	Log-rank				0.81	AZD5363
	25388642	120	Retrospective							0	120			Mixed	Protein	Tumor	AKT1	Phosphorylation level	120	PFS	univariable	Log-rank				0.87	AZD5363
	21284050	95	Prospective non-randomized			95	0	0	0	15	80			Mixed	Protein	Tumor	STAT3	IHC level	95	DFS	multivariable	HR	2.16	1.2579	4	0.01
	21284050	95	Retrospective			95	0	0	0	15	80			Mixed	Protein	Tumor	STAT3	IHC level	95	OS	multivariable	HR	1.76	0.8945	3	0.1
	24510528	50	Retrospective	37	13	0	0	0	0				68	Adjuvant	Protein	Tumor	TP53	IHC level	50	OS	multivariable	HR	6.91	2.354	20	<0.001
	23564498	40	Retrospective	22	18	2	1	12	25			2.5		Mixed	Protein	Tumor	TP53	IHC level	40	OS	univariable	Log-rank	better			0.02
	31822892	51	Retrospective	36	15	0	0	0	0	18	33	82.4	70	Primary	Protein	Tumor	TP53	Mutation status	51	OS	univariable	Log-rank				0.12
	29235112	145	Retrospective	122	23	87	20	0	38	0	145	100	66	Adjuvant	Protein	Tumor	TP53	IHC level	145	OS	multivariable	HR	0.69	0.36	1	0.27
	19733016	148	Prospective randomized trial	133	15	0	0	73	0				62	Adjuvant	Protein	Tumor	TP53	IHC level	148	LRC	univariable	HR	0.99	0.73	1	0.39
	27913065	158	Retrospective	133	25	80	51	0	27	0	158	100	68.4	Primary	Protein	Tumor	TP53	IHC level	158	FFDM	univariable	HR	1.36	0.64	3	0.43
	31822892	51	Retrospective	36	15	0	0	0	0	18	33	82.4	70	Primary	Protein	Tumor	TP53	Mutation status	51	LRC	univariable	Log-rank				0.46
	27913065	158	Retrospective	133	25	80	51	0	27	0	158	100	68.4	Primary	Protein	Tumor	TP53	IHC level	158	OS	univariable	HR	1.16	0.73	2	0.53
	26178914	161	Retrospective	131	30	98	26	0	41			100	60	Adjuvant	Protein	Tumor	TP53	IHC level	161	OS	multivariable	HR	0.83	0.45	2	0.54
	29235112	145	Retrospective	122	23	87	20	0	38	0	145	100	66	Adjuvant	Protein	Tumor	TP53	IHC level	145	DMFS	multivariable	HR	0.86	0.46	2	0.63
	29235112	145	Retrospective	122	23	87	20	0	38	0	145	100	66	Adjuvant	Protein	Tumor	TP53	IHC level	145	LPFS	multivariable	HR	0.9	0.48	2	0.77
	31822892	51	Retrospective	36	15	0	0	0	0	18	33	82.4	70	Primary	Protein	Tumor	TP53	Mutation status	51	PFS	univariable	Log-rank				0.82
	27913065	158	Retrospective	133	25	80	51	0	27	0	158	100	68.4	Primary	Protein	Tumor	TP53	IHC level	158	LRC	univariable	HR	1.06	0.62	2	0.84
	26178914	161	Retrospective	131	30	98	26	0	41			100	60	Adjuvant	Protein	Tumor	TP53	IHC level	161	DMFS	multivariable	HR	1.02	0.573	2	0.95
	26178914	161	Retrospective	131	30	98	26	0	41			100	60	Adjuvant	Protein	Tumor	TP53	IHC level	161	LPFS	multivariable	HR	0.99	0.554	2	0.97
	25868613	151	Retrospective	115	36	62	22	36	31	0	151	46	60	Adjuvant	Protein	Tumor	RELA	IHC level	151	LRC	multivariable	HR	5.06	1.63	13	0.01
	25868613	151	Retrospective	115	36	62	22	36	31	0	151	46	60	Adjuvant	Protein	Tumor	RELA	IHC level	151	OS	multivariable	HR	3.02	0.99	8	0.05
	25868613	151	Retrospective	115	36	62	22	36	31	0	151	46	60	Adjuvant	Protein	Tumor	RELA	IHC level	151	DMFS	univariable	Log-rank	equal			0.29
	20502457	140	Retrospective	94	46	25	8	28	79	22	118			Adjuvant	Protein	Tumor	AKT1	IHC level	140	LRR	univariable	HR	2.2	1	5	0.04	AZD5363
	20388242	60	Retrospective	43	17	60	0	0	0	15	45		54.7	Mixed	Protein	Tumor	AKT1	IHC level	60	LRC	univariable	HR	0.81	0.41	2	0.56	AZD5363
	20388242	60	Retrospective	43	17	60	0	0	0	15	45		54.7	Mixed	Protein	Tumor	AKT1	IHC level	60	DSS	univariable	HR	1.17	0.61	2	0.64	AZD5363
	28480996	161	Retrospective	131	30	98	22	0	41			100	60	Adjuvant	Protein	Tumor	PDCD1	IHC level	161	OS	univariable	Log-rank	no correlation			0.09
	28480996	161	Retrospective	131	30	98	22	0	41			100	60	Adjuvant	Protein	Tumor	PDCD1	IHC level	161	DMFS	univariable	Log-rank	no correlation			0.1
	28480996	161	Retrospective	131	30	98	22	0	41			100	60	Adjuvant	Protein	Tumor	PDCD1	IHC level	161	LPFS	univariable	Log-rank	no correlation			0.15
	28476872	68	Retrospective			7	14	11	33					Adjuvant	Protein	Tumor	CD274	RPPA	68	LRR	multivariable	HR	2.83	1.6	5	0
	28476872	114	Retrospective			6	17	24	55				60	Adjuvant	Protein	Tumor	CD274	IHC level	114	DSS	univariable	Log-rank	worse			0
	28476872	114	Retrospective			6	17	24	55				60	Adjuvant	Protein	Tumor	CD274	IHC level	114	LRR	multivariable	HR	1.02	1.002	1	0.02
	28480996	161	Retrospective	131	30	98	22	0	41			100	60	Adjuvant	Protein	Tumor	CD274	IHC level	161	OS	multivariable	HR	0.47	0.245	0.9	0.03
	28476872	68	Retrospective			7	14	11	33					Adjuvant	Protein	Tumor	CD274	RPPA	68	DSS	univariable	Log-rank	worse			0.04
	28480996	161	Retrospective	131	30	98	22	0	41			100	60	Adjuvant	Protein	Tumor	CD274	IHC level	161	LPFS	multivariable	HR	0.54	0.289	1	0.05
	28480996	161	Retrospective	131	30	98	22	0	41			100	60	Adjuvant	Protein	Tumor	CD274	IHC level	161	DMFS	multivariable	HR	0.54	0.291	1	0.05
	32079442	303	Retrospective	217	86	303	0	0	0	58	245	96	66	Primary	Protein	Tumor	CD274	IHC level	303	LRC	multivariable	HR	1.1	0.68	2	0.7
	32079442	303	Retrospective	217	86	303	0	0	0	58	245	96	66	Primary	Protein	Tumor	CD274	IHC level	303	DSM	multivariable	HR	1	0.62	2	0.8
	32079442	303	Retrospective	217	86	303	0	0	0	58	245	96	66	Primary	Protein	Tumor	CD274	IHC level	303	OS	multivariable	HR	1	0.71	1	0.9
	20502457	140	Retrospective	94	46	25	8	28	79	22	118			Adjuvant	Protein	Tumor	EGFR	IHC level	140	LRR	univariable	HR	1.2	0.6	3	0.58	Afatinib, Dacomitinib, Erlotinib, Erlotinib + Ramucirumab, Gefitinib, Osimertinib, Amivantamab, Mobocertinib, Erlotinib, Patritumab Deruxtecan, CLN-081, Poziotinib
	20502457	140	Retrospective	94	46	25	8	28	79	22	118			Adjuvant	Protein	Tumor	MAPK1	IHC level	140	LRR	univariable	HR	1.2	0.5	3	0.65
	26265441	69	Retrospective	45	24	5	2	14	44	4	65			Adjuvant	Protein	Tumor	MAPK1	IHC level	69	OS	multivariable	HR	0.43	0.1588	1	0.09
	20502457	140	Retrospective	94	46	25	8	28	79	22	118			Adjuvant	Protein	Tumor	PIK3CA	IHC level	140	LRR	univariable	HR	0.6	0.3	1	0.25	Alpelisib + Fulvestrant
	24928249	160	Retrospective	124	36	64	23	39	34	0	160	42	60	Adjuvant	Protein	Tumor	PDPN	IHC level	160	DMFS	univariable	Log-rank	worse			0.05
	24928249	160	Retrospective	124	36	64	23	39	34	0	160	42	60	Adjuvant	Protein	Tumor	PDPN	IHC level	160	OS	multivariable	HR	1.86	0.96	4	0.07
	24928249	160	Retrospective	124	36	64	23	39	34	0	160	42	60	Adjuvant	Protein	Tumor	PDPN	IHC level	160	LRC	univariable	Log-rank	equal			0.92
	26265441	69	Retrospective	45	24	5	2	14	44	4	65			Adjuvant	Protein	Tumor	PRB1	IHC level	69	OS	multivariable	HR	3.28	1.3194	8	0.01
	27918595	36	Self-proclaimed prospective	7	29	13	11	6	6	0	36	16.7	52	Adjuvant	Protein	Tumor	PTCH1	IHC level	36	OS	univariable	Log-rank	equal			0.26	Sonidegib, Vismodegib
	27918595	36	Self-proclaimed prospective	7	29	13	11	6	6	0	36	16.7	52	Adjuvant	Protein	Tumor	PTCH1	IHC level	36	DFS	univariable	Log-rank	equal			0.45	Sonidegib, Vismodegib
	27918595	36	Self-proclaimed prospective	7	29	13	11	6	6	0	36	16.7	52	Adjuvant	Protein	Tumor	PTCH1	IHC level	36	LRC	univariable	Log-rank	equal			0.96	Sonidegib, Vismodegib
	22413021	147	Prospective randomized trial	132	15	21			51				63	Adjuvant	Protein	Tumor	PTEN	IHC level	147	LRC	multivariable	HR	2.84	1.38	6	0
	32296588	115	Retrospective	8	30	23	1	2	5	3	35	100			Protein	Tumor	PTEN	IHC level	115	PFS	multivariable	HR	0.12	0.01	1	0.02
	20502457	140	Retrospective	94	46	25	8	28	79	22	118			Adjuvant	Protein	Tumor	PTEN	IHC level	140	LRR	multivariable	HR	2.2	1.1	5	0.03
	31579068	127	Retrospective	102	25	0	0	0	127	39	88		60	Adjuvant	Protein	Tumor	PTPN14	IHC level	127	LRFS	multivariable	HR	6.08	2.069	18	0
	31579068	127	Retrospective	102	25	0	0	0	127	39	88		60	Adjuvant	Protein	Tumor	PTPN14	IHC level	127	DFS	multivariable	HR	4.26	1.507	12	0.01
	31579068	127	Retrospective	102	25	0	0	0	127	39	88		60	Adjuvant	Protein	Tumor	PTPN14	IHC level	127	DSS	multivariable	HR	3.89	1.283	12	0.02
	31579068	127	Retrospective	102	25	0	0	0	127	39	88		60	Adjuvant	Protein	Tumor	PTPN14	IHC level	127	OS	univariable	Cox regression				0.24
	26265441	69	Retrospective	45	24	5	2	14	44	4	65			Adjuvant	Protein	Tumor	RB1	IHC level	69	OS	univariable	Log-rank	worse			0.24
	29594214	201	Retrospective	161	40	116	29	0	56	0	201	100	56	Adjuvant	Protein	Tumor	CXCL12	IHC level, intracellular	201	LRC	multivariable	HR	2.72	1.24	6	0.01
	29061496	141	Retrospective	119	22	72	46	0	23	0	141	100	70	Primary	Protein	Tumor	CXCL12	IHC level	141	LRC	multivariable	HR	1.98	0.95	4	0.07
	29061496	141	Retrospective	119	22	72	46	0	23	0	141	100	70	Primary	Protein	Tumor	CXCL12	IHC level	141	OS	multivariable	HR	1.72	0.93	3	0.08
	29594214	201	Retrospective	161	40	116	29	0	56	0	201	100	56	Adjuvant	Protein	Tumor	CXCL12	IHC level, intracellular	201	OS	univariable	HR	1.17	0.69	2	0.56
	29594214	201	Retrospective	161	40	116	29	0	56	0	201	100	56	Adjuvant	Protein	Tumor	CXCL12	IHC level, membranous	201	DMFS	univariable	HR	1.28	0.54	3	0.58
	29594214	201	Retrospective	161	40	116	29	0	56	0	201	100	56	Adjuvant	Protein	Tumor	CXCL12	IHC level, membranous	201	OS	univariable	HR	0.82	0.37	2	0.62
	29594214	201	Retrospective	161	40	116	29	0	56	0	201	100	56	Adjuvant	Protein	Tumor	CXCL12	IHC level, membranous	201	LRC	univariable	HR	0.81	0.25	3	0.73
	29594214	201	Retrospective	161	40	116	29	0	56	0	201	100	56	Adjuvant	Protein	Tumor	CXCL12	IHC level, intracellular	201	DMFS	univariable	HR	1.02	0.5	2	0.96
	26359694	190	Self-proclaimed prospective	172	18	65	22	62	31					Mixed	Protein	Tumor	SERPINE1	IHC level	190	PFS	multivariable	HR	1.92	1.03	4	0.04
	26359694	190	Self-proclaimed prospective	172	18	65	22	62	31					Mixed	Protein	Tumor	SERPINE1	IHC level	190	CSS	multivariable	HR	1.8	0.86	4	0.12
	27918595	36	Self-proclaimed prospective	7	29	13	11	6	6	0	36	16.7	52	Adjuvant	Protein	Tumor	SHH	IHC level	36	LRC	univariable	Log-rank	equal			0.53
	27918595	36	Self-proclaimed prospective	7	29	13	11	6	6	0	36	16.7	52	Adjuvant	Protein	Tumor	SHH	IHC level	36	OS	univariable	Log-rank	equal			0.57
	27918595	36	Self-proclaimed prospective	7	29	13	11	6	6	0	36	16.7	52	Adjuvant	Protein	Tumor	SHH	IHC level	36	DFS	univariable	Log-rank	equal			0.77
	27918595	36	Self-proclaimed prospective	7	29	13	11	6	6	0	36	16.7	52	Adjuvant	Protein	Tumor	SMO	IHC level	36	OS	univariable	Log-rank	equal			0.6
	27918595	36	Self-proclaimed prospective	7	29	13	11	6	6	0	36	16.7	52	Adjuvant	Protein	Tumor	SMO	IHC level	36	LRC	univariable	Log-rank	equal			0.8
	27918595	36	Self-proclaimed prospective	7	29	13	11	6	6	0	36	16.7	52	Adjuvant	Protein	Tumor	SMO	IHC level	36	DFS	univariable	Log-rank	equal			0.85
	23564498	40	Retrospective	22	18	2	1	12	25			2.5		Mixed	Protein	Tumor	BIRC5	IHC level	40	OS	univariable	Log-rank	better			<0.001
	29180609	98	Retrospective	61	37	25		28	45			92			Protein	Tumor	BIRC5	IHC level	98	DFS	multivariable	HR	2.94	1.31	7	0.01
	29180609	98	Retrospective	61	37	25		28	45			92			Protein	Tumor	BIRC5	IHC level	98	OS	multivariable	HR	1.79	1.04	3	0.04
	31579068	127	Retrospective	102	25	0	0	0	127	39	88		60	Adjuvant	Protein	Tumor	TAFAZZIN	IHC level	127	OS	univariable	Cox regression				0.12
	31579068	127	Retrospective	102	25	0	0	0	127	39	88		60	Adjuvant	Protein	Tumor	TAFAZZIN	IHC level	127	LRFS	univariable	Cox regression				0.13
	31579068	127	Retrospective	102	25	0	0	0	127	39	88		60	Adjuvant	Protein	Tumor	TAFAZZIN	IHC level	127	DFS	univariable	Cox regression				0.19
	31579068	127	Retrospective	102	25	0	0	0	127	39	88		60	Adjuvant	Protein	Tumor	TAFAZZIN	IHC level	127	DSS	univariable	Cox regression				0.3
	29802455	62	Self-proclaimed prospective	51	11	17	45	34		2	60	43.5	66	Mixed	Protein	Blood	TNF	Level	62	OS	univariable	Log-rank	2.582	1.031	6	0.028
	31076897	62	Retrospective	51	11			34	0	2	60	38.7	66	Mixed	Protein	Blood	TNF	Plasma level	62	OS	multivariable	HR	1.5	0.532	4	0.44
	26265441	69	Retrospective	45	24	5	2	14	44	4	65			Adjuvant	Protein	Tumor	TP53	IHC level	69	OS	multivariable	HR	0.4	0.1609	1	0.05
	23748230	157	Retrospective	120	37	64	23	38	32		157	43	60	Adjuvant	Protein	Tumor	VEGFA	IHC level	157	DMFS	multivariable	HR	7.46	1.9	52	0
	23748230	157	Retrospective	120	37	64	23	38	32		157	43	60	Adjuvant	Protein	Tumor	VEGFA	IHC level	157	LRC	multivariable	HR	5.02	1.43	32	0.01
	24332450	86	Retrospective			31	0	55	0	38	48		68	Primary	Protein	Tumor	VEGFA	IHC level	86	CSS	univariable	Log-rank	worse			0.02
	23748230	157	Retrospective	120	37	64	23	38	32		157	43	60	Adjuvant	Protein	Tumor	VEGFA	IHC level	157	OS	multivariable	HR	3.22	1.05	14	0.04
	25456005	40	Retrospective	22	18	0	1	12	27			2.5	50	Mixed	Protein	Tumor	WRAP53	IHC level	40	OS	univariable	Log-rank	better			0.01
	21737503	80	Prospective Cohort	63	17	31	5	13	27	17	62	88		Mixed	Protein	Tumor	ERCC4	Expression	80	PFS	multivariable	HR	1.83	0.99	3	0.05
	31579068	127	Retrospective	102	25	0	0	0	127	39	88		60	Adjuvant	Protein	Tumor	YAP1	IHC level	127	DSS	multivariable	HR	0.33	0.153	0.7	0
	31579068	127	Retrospective	102	25	0	0	0	127	39	88		60	Adjuvant	Protein	Tumor	YAP1	IHC level	127	DFS	multivariable	HR	0.36	0.166	0.8	0.01
	31579068	127	Retrospective	102	25	0	0	0	127	39	88		60	Adjuvant	Protein	Tumor	YAP1	IHC level	127	LRFS	multivariable	HR	0.43	0.176	1	0.07
	31579068	127	Retrospective	102	25	0	0	0	127	39	88		60	Adjuvant	Protein	Tumor	YAP1	IHC level	127	OS	multivariable	HR	0.57	0.301	1	0.08
	24332450	86	Retrospective			31	0	55	0	38	48		68	Primary	Protein	Tumor	YAP1	IHC level	86	RFS	univariable	Log-rank	worse			0.01
	24332450	86	Retrospective			31	0	55	0	38	48		68	Primary	Protein	Tumor	YAP1	IHC level	86	CSS	univariable	Log-rank	worse			0.04
RNA (circular)
	33741902	78	Retrospective	68	10	0	78	0	0	35	43				Other	Tumor	CUX1	Expression	78	DFS	univariable	Log-rank	worse			0
	33741902	78	Retrospective	68	10	0	78	0	0	35	43				Other	Tumor	CUX1	Expression	78	OS	multivariable	HR	2.83	1.74	5	0.02
Serum/Plasma protein
	27075382	48	Prospective Cohort			13			19				70	Primary	Serum/Plasma protein	Blood	CA9	Level	48	OS	univariable	HR	2.3	1.04	5	0.04
	33209882	85	Retrospective	71	11	85	0	0	0	14	71	100	69.96	Primary	Serum/Plasma protein	Blood	KRT19	Level	85	OS	multivariable	HR	3.57	1.6	8	0
	33209882	85	Retrospective	71	11	85	0	0	0	14	71	100	69.96	Primary	Serum/Plasma protein	Blood	KRT19	Level	85	PFS	multivariable	HR	2.89	1.41	6	0
	28604997	185	Self-proclaimed prospective	145	40	79	25	81	0			49	50	Primary	Serum/Plasma protein	Blood	KRT19	Level, post-treatment	185	DFS	multivariable	HR	2.25	1.13	4	0.02
	28604997	185	Self-proclaimed prospective	145	40	79	25	81	0			49	50	Primary	Serum/Plasma protein	Blood	KRT19	Level, post-treatment	185	OS	multivariable	HR	2.33	1.147	5	0.02
	29658000	86	Self-proclaimed prospective	70	16	56	5	12	5	4	81	100	66	Primary	Serum/Plasma protein	Blood	EGFR	Plasma level	86	AFR	multivariable	HR	1.17	0.89	2	0.26	Afatinib, Dacomitinib, Erlotinib, Erlotinib + Ramucirumab, Gefitinib, Osimertinib, Amivantamab, Mobocertinib, Erlotinib, Patritumab Deruxtecan, CLN-081, Poziotinib
	29658000	86	Self-proclaimed prospective	70	16	56	5	12	5	4	81	100	66	Primary	Serum/Plasma protein	Blood	CCL11	Plasma level	86	AFR	multivariable	HR	0.92	0.71	1	0.52
	26919854	347	Retrospective	263	84	158	60	43	86	27	320		70	Primary	Serum/Plasma protein	Blood	Fibrinogen	Level	347	OS	multivariable	HR	2.5	1.44	4	0
	26919854	347	Retrospective	263	84	158	60	43	86	27	320		70	Adjuvant	Serum/Plasma protein	Blood	Fibrinogen	Level	347	OS	multivariable	HR	1.7	1.2	2	0
	29658000	86	Self-proclaimed prospective	70	16	56	5	12	5	4	81	100	66	Primary	Serum/Plasma protein	Blood	CSF3	Plasma level	86	AFR	multivariable	HR	0.91	0.63	1	0.6
	29658000	86	Self-proclaimed prospective	70	16	56	5	12	5	4	81	100	66	Primary	Serum/Plasma protein	Blood	CXCL1	Plasma level	86	AFR	multivariable	HR	0.82	0.6	1	0.19
	29658000	86	Self-proclaimed prospective	70	16	56	5	12	5	4	81	100	66	Primary	Serum/Plasma protein	Blood	HGF	Plasma level	86	AFR	multivariable	HR	0.73	0.47	1	0.15
	22383739	498	Prospective randomized trial	438	60	273	65	100	60		498	100		Primary	Serum/Plasma protein	Blood	HGF	Pretreatment level	498	OS	multivariable	HR	1.2			0.27
	34671818	11	Prospective Cohort	8	3	4	1	1	0			100	56	Primary	Serum/Plasma protein	Blood	HMGB1	Plasma level, during therapy	11	PFS	univariable	Log-rank	better			0
	29658000	86	Self-proclaimed prospective	70	16	56	5	12	5	4	81	100	66	Primary	Serum/Plasma protein	Blood	IL13	Plasma level	86	AFR	multivariable	HR	1.13	0.85	2	0.4
	29658000	86	Self-proclaimed prospective	70	16	56	5	12	5	4	81	100	66	Primary	Serum/Plasma protein	Blood	IL2	Plasma level	86	AFR	multivariable	HR	1.03	0.86	1	0.76
	29658000	86	Self-proclaimed prospective	70	16	56	5	12	5	4	81	100	66	Primary	Serum/Plasma protein	Blood	IL4	Plasma level	86	AFR	multivariable	HR	0.83	0.59	1	0.31
	29658000	86	Self-proclaimed prospective	70	16	56	5	12	5	4	81	100	66	Primary	Serum/Plasma protein	Blood	IL6	Plasma level	86	AFR	multivariable	HR	0.91	0.75	1	0.34
	22383739	498	Prospective randomized trial	438	60	273	65	100	60		498	100		Primary	Serum/Plasma protein	Blood	CXCL8	Pretreatment level	498	OS	multivariable	HR	1.55			0.01
	29658000	86	Self-proclaimed prospective	70	16	56	5	12	5	4	81	100	66	Primary	Serum/Plasma protein	Blood	CXCL8	Plasma level	86	AFR	multivariable	HR	0.95	0.74	1	0.73
	29658000	86	Self-proclaimed prospective	70	16	56	5	12	5	4	81	100	66	Primary	Serum/Plasma protein	Blood	LEP	Plasma level	86	AFR	multivariable	HR	1.05	0.78	1	0.74
	28049456	42	Prospective Cohort	37	5	18	7	11	3	1	41	100		Primary	Serum/Plasma protein	Blood	SPP1	Pretreatment level	42	OS	univariable	Log-rank	worse			0.02
	28049456	89	Prospective Cohort	70	19	28	4	18	31	31	58			Primary	Serum/Plasma protein	Blood	SPP1	Pretreatment level	89	OS	univariable	Log-rank	worse			0.03
	29658000	86	Self-proclaimed prospective	70	16	56	5	12	5	4	81	100	66	Primary	Serum/Plasma protein	Blood	SPP1	Plasma level	86	AFR	multivariable	HR	1.12	0.79	2	0.51
	29658000	86	Self-proclaimed prospective	70	16	56	5	12	5	4	81	100	66	Primary	Serum/Plasma protein	Blood	SERPINE1	Plasma level	86	AFR	multivariable	HR	0.73	0.41	1	0.29
	29658000	86	Self-proclaimed prospective	70	16	56	5	12	5	4	81	100	66	Primary	Serum/Plasma protein	Blood	PDGFB	Plasma level	86	AFR	multivariable	HR	0.84	0.61	1	0.29	Imatinib
	29658000	86	Self-proclaimed prospective	70	16	56	5	12	5	4	81	100	66	Primary	Serum/Plasma protein	Blood	CXCL12	Plasma level	86	AFR	multivariable	HR	0.73	0.44	1	0.23
	28049456	42	Prospective Cohort	37	5	18	7	11	3	1	41	100		Adjuvant	Serum/Plasma protein	Blood	TGFB1	Pretreatment level	42	OS	univariable	Log-rank	worse			0
	29658000	86	Self-proclaimed prospective	70	16	56	5	12	5	4	81	100	66	Primary	Serum/Plasma protein	Blood	TNF	Plasma level	86	AFR	multivariable	HR	1.01	0.84	1	0.92
	29658000	86	Self-proclaimed prospective	70	16	56	5	12	5	4	81	100	66	Primary	Serum/Plasma protein	Blood	VEGFA	Plasma level	86	AFR	multivariable	HR	0.71	0.55	0.9	0.01
	29658000	86	Self-proclaimed prospective	70	16	56	5	12	5	4	81	100	66	Primary	Serum/Plasma protein	Blood	FLT1	Plasma level	86	AFR	multivariable	HR	1.04	0.81	1	0.74
	29658000	86	Self-proclaimed prospective	70	16	56	5	12	5	4	81	100	66	Primary	Serum/Plasma protein	Blood	KDR	Plasma level	86	AFR	multivariable	HR	1.51	0.89	3	0.12
Signature, DNA
	32167160	173	Retrospective	130	43	75	67	31	0	36	137	100	70	Primary	Other	Tumor	copy number alterations signature 1 (<200mg cisplatin cohort)	signature presence	173	OS	multivariable	HR	no difference			ns
	32167160	173	Retrospective	130	43	75	67	31	0	36	137	100	70	Primary	Other	Tumor	copy number alterations signature 1 (<200mg cisplatin cohort)	signature presence	173	LRC	multivariable	HR	no difference			ns
	32167160	173	Retrospective	130	43	75	67	31	0	36	137	100	70	Primary	Other	Tumor	copy number alterations signature 1 (<200mg cisplatin cohort)	signature presence	173	DMFS	multivariable	HR	no difference			ns
	32167160	173	Retrospective	130	43	75	67	31	0	36	137	100	70	Primary	Other	Tumor	copy number alterations signature 1 (<200mg cisplatin cohort)	signature presence	173	PFS	multivariable	HR	no difference			ns
	32167160	173	Retrospective	130	43	75	67	31	0	36	137	100	70	Primary	Other	Tumor	copy number alterations signature 1 (>=200mg cisplatin cohort)	signature presence	173	PFS	multivariable	HR	better			<0.05
	32167160	173	Retrospective	130	43	75	67	31	0	36	137	100	70	Primary	Other	Tumor	copy number alterations signature 1 (>=200mg cisplatin cohort)	signature presence	173	OS	multivariable	HR	no difference			ns
	32167160	173	Retrospective	130	43	75	67	31	0	36	137	100	70	Primary	Other	Tumor	copy number alterations signature 1 (>=200mg cisplatin cohort)	signature presence	173	LRC	multivariable	HR	no difference			ns
	32167160	173	Retrospective	130	43	75	67	31	0	36	137	100	70	Primary	Other	Tumor	copy number alterations signature 1 (>=200mg cisplatin cohort)	signature presence	173	DMFS	multivariable	HR	no difference			ns
	32167160	173	Retrospective	130	43	75	67	31	0	36	137	100	70	Primary	Other	Tumor	copy number alterations signature 2 (<200mg cisplatin cohort)	signature presence	173	LRC	multivariable	HR	no difference			ns
	32167160	173	Retrospective	130	43	75	67	31	0	36	137	100	70	Primary	Other	Tumor	copy number alterations signature 2 (<200mg cisplatin cohort)	signature presence	173	OS	multivariable	HR	no difference			ns
	32167160	173	Retrospective	130	43	75	67	31	0	36	137	100	70	Primary	Other	Tumor	copy number alterations signature 2 (<200mg cisplatin cohort)	signature presence	173	DMFS	multivariable	HR	no difference			ns
	32167160	173	Retrospective	130	43	75	67	31	0	36	137	100	70	Primary	Other	Tumor	copy number alterations signature 2 (<200mg cisplatin cohort)	signature presence	173	PFS	multivariable	HR	no difference			ns
	32167160	173	Retrospective	130	43	75	67	31	0	36	137	100	70	Primary	Other	Tumor	copy number alterations signature 2 (>=200mg cisplatin cohort)	signature presence	173	OS	multivariable	HR	no difference			ns
	32167160	173	Retrospective	130	43	75	67	31	0	36	137	100	70	Primary	Other	Tumor	copy number alterations signature 2 (>=200mg cisplatin cohort)	signature presence	173	PFS	multivariable	HR	no difference			ns
	32167160	173	Retrospective	130	43	75	67	31	0	36	137	100	70	Primary	Other	Tumor	copy number alterations signature 2 (>=200mg cisplatin cohort)	signature presence	173	LRC	multivariable	HR	no difference			ns
	32167160	173	Retrospective	130	43	75	67	31	0	36	137	100	70	Primary	Other	Tumor	copy number alterations signature 2 (>=200mg cisplatin cohort)	signature presence	173	DMFS	multivariable	HR	no difference			ns
	32167160	173	Retrospective	130	43	75	67	31	0	36	137	100	70	Primary	Other	Tumor	copy number alterations signature 3 (<200mg cisplatin cohort)	signature presence	173	PFS	multivariable	HR	no difference			ns
	32167160	173	Retrospective	130	43	75	67	31	0	36	137	100	70	Primary	Other	Tumor	copy number alterations signature 3 (<200mg cisplatin cohort)	signature presence	173	LRC	multivariable	HR	no difference			ns
	32167160	173	Retrospective	130	43	75	67	31	0	36	137	100	70	Primary	Other	Tumor	copy number alterations signature 3 (<200mg cisplatin cohort)	signature presence	173	DMFS	multivariable	HR	no difference			ns
	32167160	173	Retrospective	130	43	75	67	31	0	36	137	100	70	Primary	Other	Tumor	copy number alterations signature 3 (<200mg cisplatin cohort)	signature presence	173	OS	multivariable	HR	no difference			ns
	32167160	173	Retrospective	130	43	75	67	31	0	36	137	100	70	Primary	Other	Tumor	copy number alterations signature 3 (>=200mg cisplatin cohort)	signature presence	173	OS	multivariable	HR	no difference			ns
	32167160	173	Retrospective	130	43	75	67	31	0	36	137	100	70	Primary	Other	Tumor	copy number alterations signature 3 (>=200mg cisplatin cohort)	signature presence	173	PFS	multivariable	HR	no difference			ns
	32167160	173	Retrospective	130	43	75	67	31	0	36	137	100	70	Primary	Other	Tumor	copy number alterations signature 3 (>=200mg cisplatin cohort)	signature presence	173	LRC	multivariable	HR	no difference			ns
	32167160	173	Retrospective	130	43	75	67	31	0	36	137	100	70	Primary	Other	Tumor	copy number alterations signature 3 (>=200mg cisplatin cohort)	signature presence	173	DMFS	multivariable	HR	no difference			ns
	32167160	173	Retrospective	130	43	75	67	31	0	36	137	100	70	Primary	Other	Tumor	copy number alterations signature 4 (<200mg cisplatin cohort)	signature presence	173	PFS	multivariable	HR	no difference			ns
	32167160	173	Retrospective	130	43	75	67	31	0	36	137	100	70	Primary	Other	Tumor	copy number alterations signature 4 (<200mg cisplatin cohort)	signature presence	173	LRC	multivariable	HR	no difference			ns
	32167160	173	Retrospective	130	43	75	67	31	0	36	137	100	70	Primary	Other	Tumor	copy number alterations signature 4 (<200mg cisplatin cohort)	signature presence	173	DMFS	multivariable	HR	no difference			ns
	32167160	173	Retrospective	130	43	75	67	31	0	36	137	100	70	Primary	Other	Tumor	copy number alterations signature 4 (<200mg cisplatin cohort)	signature presence	173	OS	multivariable	HR	no difference			ns
	32167160	173	Retrospective	130	43	75	67	31	0	36	137	100	70	Primary	Other	Tumor	copy number alterations signature 4 (>=200mg cisplatin cohort)	signature presence	173	OS	multivariable	HR	no difference			ns
	32167160	173	Retrospective	130	43	75	67	31	0	36	137	100	70	Primary	Other	Tumor	copy number alterations signature 4 (>=200mg cisplatin cohort)	signature presence	173	PFS	multivariable	HR	no difference			ns
	32167160	173	Retrospective	130	43	75	67	31	0	36	137	100	70	Primary	Other	Tumor	copy number alterations signature 4 (>=200mg cisplatin cohort)	signature presence	173	LRC	multivariable	HR	no difference			ns
	32167160	173	Retrospective	130	43	75	67	31	0	36	137	100	70	Primary	Other	Tumor	copy number alterations signature 4 (>=200mg cisplatin cohort)	signature presence	173	DMFS	multivariable	HR	no difference			ns
	32167160	173	Retrospective	130	43	75	67	31	0	36	137	100	70	Primary	Other	Tumor	copy number alterations signature 5 (<200mg cisplatin cohort)	signature presence	173	DMFS	multivariable	HR	worse			<0.001
	32167160	173	Retrospective	130	43	75	67	31	0	36	137	100	70	Primary	Other	Tumor	copy number alterations signature 5 (<200mg cisplatin cohort)	signature presence	173	PFS	multivariable	HR	no difference			ns
	32167160	173	Retrospective	130	43	75	67	31	0	36	137	100	70	Primary	Other	Tumor	copy number alterations signature 5 (<200mg cisplatin cohort)	signature presence	173	LRC	multivariable	HR	no difference			ns
	32167160	173	Retrospective	130	43	75	67	31	0	36	137	100	70	Primary	Other	Tumor	copy number alterations signature 5 (<200mg cisplatin cohort)	signature presence	173	OS	multivariable	HR	no difference			ns
	32167160	173	Retrospective	130	43	75	67	31	0	36	137	100	70	Primary	Other	Tumor	copy number alterations signature 5 (>=200mg cisplatin cohort)	signature presence	173	OS	multivariable	HR	no difference			ns
	32167160	173	Retrospective	130	43	75	67	31	0	36	137	100	70	Primary	Other	Tumor	copy number alterations signature 5 (>=200mg cisplatin cohort)	signature presence	173	PFS	multivariable	HR	no difference			ns
	32167160	173	Retrospective	130	43	75	67	31	0	36	137	100	70	Primary	Other	Tumor	copy number alterations signature 5 (>=200mg cisplatin cohort)	signature presence	173	LRC	multivariable	HR	no difference			ns
	32167160	173	Retrospective	130	43	75	67	31	0	36	137	100	70	Primary	Other	Tumor	copy number alterations signature 5 (>=200mg cisplatin cohort)	signature presence	173	DMFS	multivariable	HR	no difference			ns
	32167160	173	Retrospective	130	43	75	67	31	0	36	137	100	70	Primary	Other	Tumor	copy number alterations signature 6 (<200mg cisplatin cohort)	signature presence	173	PFS	multivariable	HR	no difference			ns
	32167160	173	Retrospective	130	43	75	67	31	0	36	137	100	70	Primary	Other	Tumor	copy number alterations signature 6 (<200mg cisplatin cohort)	signature presence	173	LRC	multivariable	HR	no difference			ns
	32167160	173	Retrospective	130	43	75	67	31	0	36	137	100	70	Primary	Other	Tumor	copy number alterations signature 6 (<200mg cisplatin cohort)	signature presence	173	DMFS	multivariable	HR	no difference			ns
	32167160	173	Retrospective	130	43	75	67	31	0	36	137	100	70	Primary	Other	Tumor	copy number alterations signature 6 (<200mg cisplatin cohort)	signature presence	173	OS	multivariable	HR	no difference			ns
	32167160	173	Retrospective	130	43	75	67	31	0	36	137	100	70	Primary	Other	Tumor	copy number alterations signature 6 (>=200mg cisplatin cohort)	signature presence	173	OS	multivariable	HR	worse			<0.05
	32167160	173	Retrospective	130	43	75	67	31	0	36	137	100	70	Primary	Other	Tumor	copy number alterations signature 6 (>=200mg cisplatin cohort)	signature presence	173	PFS	multivariable	HR	worse			<0.05
	32167160	173	Retrospective	130	43	75	67	31	0	36	137	100	70	Primary	Other	Tumor	copy number alterations signature 6 (>=200mg cisplatin cohort)	signature presence	173	LRC	multivariable	HR	no difference			ns
	32167160	173	Retrospective	130	43	75	67	31	0	36	137	100	70	Primary	Other	Tumor	copy number alterations signature 6 (>=200mg cisplatin cohort)	signature presence	173	DMFS	multivariable	HR	no difference			ns
	32167160	173	Retrospective	130	43	75	67	31	0	36	137	100	70	Primary	Other	Tumor	copy number alterations signature 7 (<200mg cisplatin cohort)	signature presence	173	PFS	multivariable	HR	no difference			ns
	32167160	173	Retrospective	130	43	75	67	31	0	36	137	100	70	Primary	Other	Tumor	copy number alterations signature 7 (<200mg cisplatin cohort)	signature presence	173	LRC	multivariable	HR	no difference			ns
	32167160	173	Retrospective	130	43	75	67	31	0	36	137	100	70	Primary	Other	Tumor	copy number alterations signature 7 (<200mg cisplatin cohort)	signature presence	173	DMFS	multivariable	HR	no difference			ns
	32167160	173	Retrospective	130	43	75	67	31	0	36	137	100	70	Primary	Other	Tumor	copy number alterations signature 7 (<200mg cisplatin cohort)	signature presence	173	OS	multivariable	HR	no difference			ns
	32167160	173	Retrospective	130	43	75	67	31	0	36	137	100	70	Primary	Other	Tumor	copy number alterations signature 7 (>=200mg cisplatin cohort)	signature presence	173	OS	multivariable	HR	no difference			ns
	32167160	173	Retrospective	130	43	75	67	31	0	36	137	100	70	Primary	Other	Tumor	copy number alterations signature 7 (>=200mg cisplatin cohort)	signature presence	173	PFS	multivariable	HR	no difference			ns
	32167160	173	Retrospective	130	43	75	67	31	0	36	137	100	70	Primary	Other	Tumor	copy number alterations signature 7 (>=200mg cisplatin cohort)	signature presence	173	LRC	multivariable	HR	no difference			ns
	32167160	173	Retrospective	130	43	75	67	31	0	36	137	100	70	Primary	Other	Tumor	copy number alterations signature 7 (>=200mg cisplatin cohort)	signature presence	173	DMFS	multivariable	HR	no difference			ns
Signature, epigenetic
	34648658	125	Retrospective	102	23	36	17	0	72	6	119	43	66	Adjuvant	Other	Tumor	DNA methylation signature	High- risk signature presence	125	OS	multivariable	HR	1.98	1.17	3	0.01
	34648658	125	Retrospective	102	23	36	17	0	72	6	119	43	66	Adjuvant	Other	Tumor	DNA methylation signature	High- risk signature presence	125	LR	multivariable	HR	2.41	1	6	0.05
	34648658	125	Retrospective	102	23	36	17	0	72	6	119	43	66	Adjuvant	Other	Tumor	DNA methylation signature	High- risk signature presence	125	PFS	multivariable	HR	2.1	1.04	4	0.38
Signature, mRNA
	34999136	128	Retrospective	99	29	59	21	0	48	4	124	100	56	Adjuvant	Signature, mRNA	Tumor	10-gene GARD signature (radiosensitivity)	Expression	128	LRC	multivariable	HR	4.9	1.97	12	0
	34999136	128	Retrospective	99	29	59	21	0	48	4	124	100	56	Adjuvant	Signature, mRNA	Tumor	10-gene GARD signature (radiosensitivity)	Expression	128	OS	multivariable	HR	2.22	1.23	4	0.01
	34999136	128	Retrospective	99	29	59	21	0	48	4	124	100	56	Adjuvant	Signature, mRNA	Tumor	12-gene SIG signature (prognosis and immune processes)	Expression	128	OS	univariable	HR	2.21	1.26	4	0.01
	34999136	128	Retrospective	99	29	59	21	0	48	4	124	100	56	Adjuvant	Signature, mRNA	Tumor	12-gene SIG signature (prognosis and immune processes)	Expression	128	LRC	univariable	HR	1.72	0.8	4	0.16
	21846821	323	Prospective randomized trial										62	Primary	Signature, mRNA	Tumor	15-gene hypoxia signature	Hypoxia	323	LRC	multivariable	HR	1.41	1.03	2	<0.05
	34999136	128	Retrospective	99	29	59	21	0	48	4	124	100	56	Adjuvant	Signature, mRNA	Tumor	15-gene hypoxia signature	Expression	128	OS	multivariable	HR	2.33	1.33	4	0
	29657990	152	Retrospective	127	25	46	15	8	83	5	147	36	56	Adjuvant	Signature, mRNA	Tumor	15-gene hypoxia signature	Expression	152	LRC	multivariable	Concordance index	0.64	0.54	0.7	0.01
	34999136	128	Retrospective	99	29	59	21	0	48	4	124	100	56	Adjuvant	Signature, mRNA	Tumor	15-gene hypoxia signature	Expression	128	LRC	multivariable	HR	2.46	1.12	5	0.03
	27913065	158	Retrospective	133	25	80	51	0	27	0	158	100	68.4	Primary	Signature, mRNA	Tumor	15-gene hypoxia signature	Expression	158	OS	multivariable	HR	10.4	1.04	104	0.05
	27913065	158	Retrospective	133	25	80	51	0	27	0	158	100	68.4	Primary	Signature, mRNA	Tumor	15-gene hypoxia signature	Expression	158	LRC	multivariable	HR	10.7	0.84	136	0.07
	27913065	158	Retrospective	133	25	80	51	0	27	0	158	100	68.4	Primary	Signature, mRNA	Tumor	15-gene hypoxia signature	Expression	158	FFDM	multivariable	HR	21.9	0.42	1,137	0.13
	30993218	92	Mixed	76	16	24	30	8	30			100	72	Primary	Signature, mRNA	Tumor	15-gene hypoxia signature + tumor volume	signature presence	92	OS	multivariable	Concordance index	0.6	0.52	0.7	0.02
	30993218	92	Mixed	76	16	24	30	8	30			100	72	Primary	Signature, mRNA	Tumor	15-gene hypoxia signature + tumor volume	signature presence	92	LRC	multivariable	Concordance index	0.54	0.43	0.6	0.5
	30993218	92	Mixed	76	16	24	30	8	30			100	72	Primary	Signature, mRNA	Tumor	15-gene hypoxia signature + tumor volume + CD44	signature presence	92	OS	multivariable	Concordance index	0.66	0.58	0.7	0.01
	30993218	92	Mixed	76	16	24	30	8	30			100	72	Primary	Signature, mRNA	Tumor	15-gene hypoxia signature + tumor volume + SLC3A2	signature presence	92	LRC	multivariable	Concordance index	0.56	0.45	0.7	0.29
	29657990	152	Retrospective	127	25	46	15	8	83	5	147	36	56	Adjuvant	Signature, mRNA	Tumor	26-gene hypoxia signature	Expression	152	LRC	multivariable	Concordance index	0.62	0.53	0.7	0.01
	27913065	158	Retrospective	133	25	80	51	0	27	0	158	100	68.4	Primary	Signature, mRNA	Tumor	26-gene hypoxia signature	Expression	158	LRC	univariable	HR	1.39	0.77	3	0.28
	27913065	158	Retrospective	133	25	80	51	0	27	0	158	100	68.4	Primary	Signature, mRNA	Tumor	26-gene hypoxia signature	Expression	158	OS	univariable	HR	1.15	0.7	2	0.58
	27913065	158	Retrospective	133	25	80	51	0	27	0	158	100	68.4	Primary	Signature, mRNA	Tumor	26-gene hypoxia signature	Expression	158	FFDM	univariable	HR	1	0.44	2	1
	27913065	158	Retrospective	133	25	80	51	0	27	0	158	100	68.4	Primary	Signature, mRNA	Tumor	30-gene hypoxia signature	Expression	158	LRC	multivariable	HR	12.8	0.81	202	0.07
	27913065	158	Retrospective	133	25	80	51	0	27	0	158	100	68.4	Primary	Signature, mRNA	Tumor	30-gene hypoxia signature	Expression	158	FFDM	multivariable	HR	31.3	0.53	1,861	0.1
	27913065	158	Retrospective	133	25	80	51	0	27	0	158	100	68.4	Primary	Signature, mRNA	Tumor	30-gene hypoxia signature	Expression	158	OS	multivariable	HR	6.78	0.66	70	0.11
	30993218	92	Mixed	76	16	24	30	8	30			100	72	Primary	Signature, mRNA	Tumor	30-gene hypoxia signature + tumor volume	signature presence	92	OS	multivariable	Concordance index	0.63	0.54	0.7	0.01
	30993218	92	Mixed	76	16	24	30	8	30			100	72	Primary	Signature, mRNA	Tumor	30-gene hypoxia signature + tumor volume	signature presence	92	LRC	multivariable	Concordance index	0.59	0.48	0.7	0.12
	30993218	92	Mixed	76	16	24	30	8	30			100	72	Primary	Signature, mRNA	Tumor	30-gene hypoxia signature + tumor volume + CD44	signature presence	92	OS	multivariable	Concordance index	0.7	0.61	0.8	0.01
	30993218	92	Mixed	76	16	24	30	8	30			100	72	Primary	Signature, mRNA	Tumor	30-gene hypoxia signature + tumor volume + SLC3A2	signature presence	92	LRC	multivariable	Concordance index	0.6	0.49	0.7	0.07
	34999136	128	Retrospective	99	29	59	21	0	48	4	124	100	56	Adjuvant	Signature, mRNA	Tumor	31-gene radiosensitivity signature	Expression	128	OS	univariable	HR	1.95	1.13	3	0.02
	34999136	128	Retrospective	99	29	59	21	0	48	4	124	100	56	Adjuvant	Signature, mRNA	Tumor	31-gene radiosensitivity signature	Expression	128	LRC	univariable	HR	1.86	0.87	4	0.09
	30626753	47	Retrospective	42	5	47	0	0	0	0	47			Mixed	Signature, mRNA	Tumor	38-gene set (HPV correlated genes)	Signature subtype	47	OS	univariable	Log-rank	worse			0.01
	30259648	108	Retrospective	74	34	52	17	12	27	11	97	67		Adjuvant	Signature, mRNA	Tumor	4-gene expression signature (APRT, CENPBD1, CHMP1A, GALNS)	High- risk signature presence	108	OS	multivariable	HR	2.17	1.18	4	0.02
	30259648	108	Retrospective	74	34	52	17	12	27	11	97	67		Adjuvant	Signature, mRNA	Tumor	4-gene expression signature (APRT, CENPBD1, CHMP1A, GALNS)	High- risk signature presence	108	LRFS	univariable	HR	1.87	1.03	3	0.04
	30259648	108	Retrospective	74	34	52	17	12	27	11	97	67		Adjuvant	Signature, mRNA	Tumor	4-gene expression signature (APRT, CENPBD1, CHMP1A, GALNS)	High- risk signature presence	108	RFS	univariable	HR	1.84	1.01	3	0.04
	34999136	128	Retrospective	99	29	59	21	0	48	4	124	100	56	Adjuvant	Signature, mRNA	Tumor	42-gene EMT signature	Expression	128	LRC	multivariable	HR	4.07	1.6	10	0
	34999136	128	Retrospective	99	29	59	21	0	48	4	124	100	56	Adjuvant	Signature, mRNA	Tumor	42-gene EMT signature	Expression	128	OS	multivariable	HR	1.98	1.12	4	0.02
	34999136	128	Retrospective	99	29	59	21	0	48	4	124	100	56	Adjuvant	Signature, mRNA	Tumor	7-gene signature (apoptosis, damage repair, cell growth, etc.)	Expression	128	LRC	multivariable	HR	3.08	1.29	7	0.01
	34999136	128	Retrospective	99	29	59	21	0	48	4	124	100	56	Adjuvant	Signature, mRNA	Tumor	7-gene signature (apoptosis, damage repair, cell growth, etc.)	Expression	128	OS	multivariable	HR	1.84	1.05	3	0.03
	31998639	197	Retrospective	55	142	85	78	34	0	2	195	100	70	Primary	Signature, mRNA	Tumor	DNA crosslink repair (multiple genes)	Expression	197	OS	multivariable	HR	1.97	1.24	3	0
	31998639	197	Retrospective	55	142	85	78	34	0	2	195	100	70	Primary	Signature, mRNA	Tumor	DNA crosslink repair (multiple genes)	Expression	197	PFS	multivariable	HR	1.8	1.16	3	0.01
	31998639	197	Retrospective	55	142	85	78	34	0	2	195	100	70	Primary	Signature, mRNA	Tumor	DNA crosslink repair (multiple genes)	Expression	197	DRR	multivariable	HR	2.69	0.95	8	0.06
	31998639	197	Retrospective	55	142	85	78	34	0	2	195	100	70	Primary	Signature, mRNA	Tumor	DNA crosslink repair (multiple genes)	Expression	197	LRC	multivariable	HR	1.67	0.93	3	0.09
	31998639	197	Retrospective	55	142	85	78	34	0	2	195	100	70	Primary	Signature, mRNA	Tumor	EGFR (Starmans signature)	Expression	197	PFS	multivariable	HR	1.82	1.21	3	0
	31998639	197	Retrospective	55	142	85	78	34	0	2	195	100	70	Primary	Signature, mRNA	Tumor	EGFR (Starmans signature)	Expression	197	OS	multivariable	HR	1.68	1.11	3	0.01
	31998639	197	Retrospective	55	142	85	78	34	0	2	195	100	70	Primary	Signature, mRNA	Tumor	EGFR (Starmans signature)	Expression	197	DRR	multivariable	HR	2.07	1.07	4	0.03
	31998639	197	Retrospective	55	142	85	78	34	0	2	195	100	70	Primary	Signature, mRNA	Tumor	EGFR (Starmans signature)	Expression	197	LRC	multivariable	HR	0.48	0.22	1	0.06
	31998639	197	Retrospective	55	142	85	78	34	0	2	195	100	70	Primary	Signature, mRNA	Tumor	EMT (multiple genes)	Expression	197	OS	multivariable	HR	2.15	1.32	3	0
	31998639	197	Retrospective	55	142	85	78	34	0	2	195	100	70	Primary	Signature, mRNA	Tumor	EMT (multiple genes)	Expression	197	PFS	multivariable	HR	2.19	1.35	4	0
	31998639	197	Retrospective	55	142	85	78	34	0	2	195	100	70	Primary	Signature, mRNA	Tumor	EMT (multiple genes)	Expression	197	DRR	multivariable	HR	3.14	1.34	7	0.01
	31998639	197	Retrospective	55	142	85	78	34	0	2	195	100	70	Primary	Signature, mRNA	Tumor	EMT (multiple genes)	Expression	197	LRC	multivariable	HR	1.65	0.77	4	0.2
	31998639	197	Retrospective	55	142	85	78	34	0	2	195	100	70	Primary	Signature, mRNA	Tumor	Hypoxia, acute (Seigneuric signature)	Expression	197	DRR	multivariable	HR	2.44	1.25	5	0.01
	31998639	197	Retrospective	55	142	85	78	34	0	2	195	100	70	Primary	Signature, mRNA	Tumor	Hypoxia, acute (Seigneuric signature)	Expression	197	OS	multivariable	HR	1.62	1.07	2	0.02
	31998639	197	Retrospective	55	142	85	78	34	0	2	195	100	70	Primary	Signature, mRNA	Tumor	Hypoxia, acute (Seigneuric signature)	Expression	197	PFS	multivariable	HR	1.64	1.09	2	0.02
	31998639	197	Retrospective	55	142	85	78	34	0	2	195	100	70	Primary	Signature, mRNA	Tumor	Hypoxia, acute (Seigneuric signature)	Expression	197	LRC	multivariable	HR	1.9	1.07	3	0.03
	31998639	197	Retrospective	55	142	85	78	34	0	2	195	100	70	Primary	Signature, mRNA	Tumor	Hypoxia, chronic (Toustrup signature)	Expression	197	LRC	multivariable	HR	3.95	1.56	10	0
	31998639	197	Retrospective	55	142	85	78	34	0	2	195	100	70	Primary	Signature, mRNA	Tumor	Hypoxia, chronic (Toustrup signature)	Expression	197	PFS	multivariable	HR	1.7	1.11	3	0.02
	31998639	197	Retrospective	55	142	85	78	34	0	2	195	100	70	Primary	Signature, mRNA	Tumor	Hypoxia, chronic (Toustrup signature)	Expression	197	OS	multivariable	HR	1.48	0.94	2	0.09
	31998639	197	Retrospective	55	142	85	78	34	0	2	195	100	70	Primary	Signature, mRNA	Tumor	Hypoxia, chronic (Toustrup signature)	Expression	197	DRR	multivariable	HR	1.57	0.68	4	0.29
	31998639	197	Retrospective	55	142	85	78	34	0	2	195	100	70	Primary	Signature, mRNA	Tumor	Proliferation	Expression	197	DRR	multivariable	HR	3.61	1.27	10	0.02
	31998639	197	Retrospective	55	142	85	78	34	0	2	195	100	70	Primary	Signature, mRNA	Tumor	Proliferation	Expression	197	PFS	multivariable	HR	1.5	1.02	2	0.04
Signature, protein
	29079308	100	Retrospective	80	20	64				0	100	100	70	Primary	Signature, protein	Tumor	CD34+ structures low + CA-IX high, combined	IHC level	100	LRC	multivariable	HR	2.4	1.1	5	0.02
	29061496	141	Retrospective	119	22	72	46	0	23	0	141	100	70	Primary	Signature, protein	Tumor	CXCR4 + SDF-1 (combined)	IHC level	141	OS	multivariable	HR	2.02	1.13	4	0.02
	29061496	141	Retrospective	119	22	72	46	0	23	0	141	100	70	Primary	Signature, protein	Tumor	CXCR4 + SDF-1 (combined)	IHC level	141	LRC	multivariable	HR	2.33	1.18	5	0.02
	28166815	109	Retrospective	83	26	109	0	0	0			33.9		Mixed	Signature, protein	Tumor	ESR2 and SMR3A	Signature presence	109	PFS	multivariable	HR	1.88	1.075	3	0.03
	28166815	109	Retrospective	83	26	109	0	0	0			33.9		Mixed	Signature, protein	Tumor	ESR2 and SMR3A	Signature presence	109	DSS	multivariable	HR	1.56	0.872	3	0.13
	29594214	201	Retrospective	161	40	116	29	0	56	0	201	100	56	Adjuvant	Signature, protein	Tumor	SDF-1 + CXCR4	IHC level, intracellular	201	LRC	multivariable	HR	2.66	1.18	6	0.02
	29594214	201	Retrospective	161	40	116	29	0	56	0	201	100	56	Adjuvant	Signature, protein	Tumor	SDF-1 + CXCR4	IHC level, intracellular	201	DMFS	univariable	HR	0.77	0.27	2	0.61
	29594214	201	Retrospective	161	40	116	29	0	56	0	201	100	56	Adjuvant	Signature, protein	Tumor	SDF-1 + CXCR4	IHC level, intracellular	201	OS	univariable	HR	1.15	0.59	2	0.68
	25456005	40	Retrospective	22	18	0	1	12	27			2.5	50	Mixed	Signature, protein	Tumor	WRAP53	IHC level	40	OS	univariable	Log-rank	better			0
	31579068	127	Retrospective	102	25	0	0	0	127	39	88		60	Adjuvant	Signature, protein	Tumor	YAP1	IHC level	127	DFS	multivariable	HR	2.09	1.027	4	0.01
	31579068	127	Retrospective	102	25	0	0	0	127	39	88		60	Adjuvant	Signature, protein	Tumor	YAP1	IHC level	127	OS	univariable	Cox regression				0.06
	31579068	127	Retrospective	102	25	0	0	0	127	39	88		60	Adjuvant	Signature, protein	Tumor	YAP1	IHC level	127	DSS	univariable	Cox regression				0.11
	31579068	127	Retrospective	102	25	0	0	0	127	39	88		60	Adjuvant	Signature, protein	Tumor	YAP1	IHC level	127	LRFS	univariable	Cox regression				0.17
Unspecified blood markers
	21889392	31	Prospective non-randomized	27	4	16	3	4	3	0	31	100	70	Primary	Other	Blood	CD40LG	Level	31	PFS		HR	4.18			0.14
	21889392	31	Prospective non-randomized	27	4	16	3	4	3	0	31	100	70	Primary	Other	Blood	CXCL5	Level	31	PFS		HR	0.86			0.88
	21889392	31	Prospective non-randomized	27	4	16	3	4	3	0	31	100	70	Primary	Other	Blood	EGF	Level	31	PFS		HR	5.89			0.07
	21889392	31	Prospective non-randomized	27	4	16	3	4	3	0	31	100	70	Primary	Other	Blood	CCL11	Level	31	PFS		HR	0.54			0.54
	21889392	31	Prospective non-randomized	27	4	16	3	4	3	0	31	100	70	Primary	Other	Blood	FGF2	Level	31	PFS		HR	2.19			0.44
	21889392	31	Prospective non-randomized	27	4	16	3	4	3	0	31	100	70	Primary	Other	Blood	CSF3	Level	31	PFS		HR	0.75			0.77
	21889392	31	Prospective non-randomized	27	4	16	3	4	3	0	31	100	70	Primary	Other	Blood	CSF2	Level	31	PFS		HR	0.74			0.77
	21889392	31	Prospective non-randomized	27	4	16	3	4	3	0	31	100	70	Primary	Other	Blood	HGF	Level	31	PFS		HR	1.06			0.96
	21889392	31	Prospective non-randomized	27	4	16	3	4	3	0	31	100	70	Primary	Other	Blood	IFNG	Level	31	PFS		HR	1.89			0.52
	21889392	31	Prospective non-randomized	27	4	16	3	4	3	0	31	100	70	Primary	Other	Blood	IL10	Level	31	PFS		HR	0.68			0.7
	21889392	31	Prospective non-randomized	27	4	16	3	4	3	0	31	100	70	Primary	Other	Blood	IL12A	Level	31	PFS		HR	1.4			0.74
	21889392	31	Prospective non-randomized	27	4	16	3	4	3	0	31	100	70	Primary	Other	Blood	IL13	Level	31	PFS		HR	0.09			0.02
	21889392	31	Prospective non-randomized	27	4	16	3	4	3	0	31	100	70	Primary	Other	Blood	IL17A	Level	31	PFS		HR	3.03			0.27
	21889392	31	Prospective non-randomized	27	4	16	3	4	3	0	31	100	70	Primary	Other	Blood	IL1A	Level	31	PFS		HR	2.32			0.41
	21889392	31	Prospective non-randomized	27	4	16	3	4	3	0	31	100	70	Primary	Other	Blood	IL1B	Level	31	PFS		HR	0.46			0.43
	21889392	31	Prospective non-randomized	27	4	16	3	4	3	0	31	100	70	Primary	Other	Blood	IL1RN	Level	31	PFS		HR	4.17			0.15
	21889392	31	Prospective non-randomized	27	4	16	3	4	3	0	31	100	70	Primary	Other	Blood	IL2	Level	31	PFS		HR	0.93			0.94
	21889392	31	Prospective non-randomized	27	4	16	3	4	3	0	31	100	70	Primary	Other	Blood	IL4	Level	31	PFS		HR	0.89			0.91
	21889392	31	Prospective non-randomized	27	4	16	3	4	3	0	31	100	70	Primary	Other	Blood	IL5	Level	31	PFS		HR	0.83			0.26
	21889392	31	Prospective non-randomized	27	4	16	3	4	3	0	31	100	70	Primary	Other	Blood	IL6	Level	31	PFS		HR	5.17			0.09
	21889392	31	Prospective non-randomized	27	4	16	3	4	3	0	31	100	70	Primary	Other	Blood	CXCL8	Level	31	PFS		HR	1.01			0.99
	21889392	31	Prospective non-randomized	27	4	16	3	4	3	0	31	100	70	Primary	Other	Blood	CXCL1	Level	31	PFS		HR	0.54			0.42
	21889392	31	Prospective non-randomized	27	4	16	3	4	3	0	31	100	70	Primary	Other	Blood	CXCL11	Level	31	PFS		HR	0.62			0.62
	21889392	31	Prospective non-randomized	27	4	16	3	4	3	0	31	100	70	Primary	Other	Blood	LEP	Level	31	PFS		HR	1.28			0.81
	21889392	31	Prospective non-randomized	27	4	16	3	4	3	0	31	100	70	Primary	Other	Blood	CCL3	Level	31	PFS		HR	2.66			0.33
	21889392	31	Prospective non-randomized	27	4	16	3	4	3	0	31	100	70	Primary	Other	Blood	CCL4	Level	31	PFS		HR	3.2			0.23
	21889392	31	Prospective non-randomized	27	4	16	3	4	3	0	31	100	70	Primary	Other	Blood	MYO1c	Level	31	PFS		HR	0.66			0.67
	21889392	31	Prospective non-randomized	27	4	16	3	4	3	0	31	100	70	Primary	Other	Blood	CCL5	Level	31	PFS		HR	0.92			0.93
	21889392	31	Prospective non-randomized	27	4	16	3	4	3	0	31	100	70	Primary	Other	Blood	TNFRSF1A	Level	31	PFS		HR	0.44			0.41
	21889392	31	Prospective non-randomized	27	4	16	3	4	3	0	31	100	70	Primary	Other	Blood	TPO	Level	31	PFS		HR	0.51			0.49
	21889392	31	Prospective non-randomized	27	4	16	3	4	3	0	31	100	70	Primary	Other	Blood	VEGFA	Level	31	PFS		HR	5.75			0.07
Absolute patient numbers provided, except where indicated.
