# Supplementary figures and images for: Prognostic and Predictive Biomarkers in Head and Neck Squamous Cell Carcinoma Treated with Radiotherapy—A Systematic Review
Source: MDPI journal article supplement (doi:10.3390/biomedicines10123288), 2022-12-19

A Overall Survival

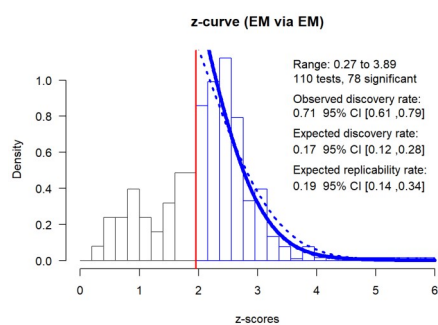

B Progression-free Survival

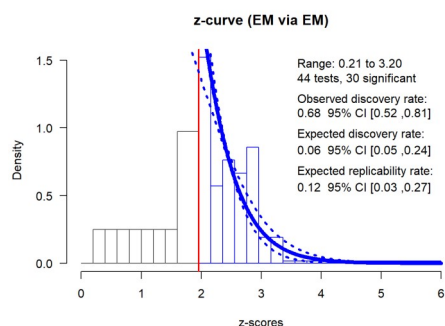

C Locoregional Control

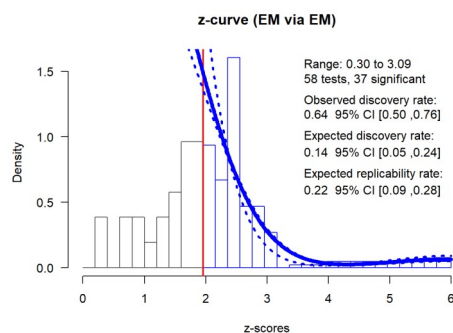

Supplement: s1 [file s1]
